# Supplementary material for: COVID-19 spread algorithm in the international airport network-DetArpds
Source: PeerJ journal article supplement (doi:10.7717/peerj-cs.1228), 2023-02-16
Supplement: Code_and_datasets.zip [file Code_and_datasets.zip]

## Sheet: Hoja1
COUNTRY	IdO	IATA_ORIGEN	LatitudeO	LongitudeO	IdF	IATA_DESTINO	LatitudeF	LongitudeF
AFGANISTAN	1	HEA	34.2126	62.2265	522	MHD	36.2284	59.6431
AFGANISTAN	2	KBL	34.5614	69.2104	1110	DXB	25.2535	55.3652
AFGANISTAN	2	KBL	34.5614	69.2104	486	DEL	28.5654	77.1202
AFGANISTAN	2	KBL	34.5614	69.2104	1112	SHJ	25.3282	55.5123
AFGANISTAN	2	KBL	34.5614	69.2104	1081	IST	41.2611	28.7441
AFGANISTAN	2	KBL	34.5614	69.2104	920	JED	21.6626	39.1731
AFGANISTAN	2	KBL	34.5614	69.2104	1071	ESB	40.1234	32.9916
AFGANISTAN	2	KBL	34.5614	69.2104	784	ISB	33.5567	72.8345
AFGANISTAN	2	KBL	34.5614	69.2104	522	MHD	36.2284	59.6431
AFGANISTAN	2	KBL	34.5614	69.2104	923	RUH	24.9648	46.7016
AFGANISTAN	2	KBL	34.5614	69.2104	210	URC	43.9078	87.4741
AFGANISTAN	2	KBL	34.5614	69.2104	608	ALA	43.3505	77.0243
AFGANISTAN	2	KBL	34.5614	69.2104	1225	TAS	41.2511	69.2649
AFGANISTAN	2	KBL	34.5614	69.2104	1034	DYU	38.5497	68.8142
AFGANISTAN	2	KBL	34.5614	69.2104	625	KWI	29.2407	47.9711
AFGANISTAN	2	KBL	34.5614	69.2104	1082	SAW	40.9063	29.3173
AFGANISTAN	2	KBL	34.5614	69.2104	487	PNQ	18.5851	73.9099
AFGANISTAN	3	KDH	31.502	65.8502	920	JED	21.6626	39.1731
AFGANISTAN	3	KDH	31.502	65.8502	1110	DXB	25.2535	55.3652
AFGANISTAN	3	KDH	31.502	65.8502	486	DEL	28.5654	77.1202
AFGANISTAN	4	MZR	36.6924	67.1182	877	SVO	55.9744	37.4133
AFGANISTAN	4	MZR	36.6924	67.1182	1081	IST	41.2611	28.7441
AFGANISTAN	4	MZR	36.6924	67.1182	522	MHD	36.2284	59.6431
AFGANISTAN	4	MZR	36.6924	67.1182	486	DEL	28.5654	77.1202
ALBANIA	5	TIA	41.4193	19.713	53	VIE	48.1111	16.5752
ALBANIA	5	TIA	41.4193	19.713	1081	IST	41.2611	28.7441
ALBANIA	5	TIA	41.4193	19.713	553	BGY	45.6694	9.70392
ALBANIA	5	TIA	41.4193	19.713	562	PSA	43.6897	10.3968
ALBANIA	5	TIA	41.4193	19.713	928	BEG	44.8208	20.2929
ALBANIA	5	TIA	41.4193	19.713	543	BLQ	44.5359	11.2876
ALBANIA	5	TIA	41.4193	19.713	565	FCO	41.8013	12.2456
ALBANIA	5	TIA	41.4193	19.713	570	VRN	45.4001	10.8894
ALBANIA	5	TIA	41.4193	19.713	569	VCE	45.5058	12.3405
ALBANIA	5	TIA	41.4193	19.713	555	MXP	45.6299	8.7257
ALBANIA	5	TIA	41.4193	19.713	414	ATH	37.9348	23.9462
ALBANIA	5	TIA	41.4193	19.713	1136	LTN	51.8764	-0.371575
ALBANIA	5	TIA	41.4193	19.713	387	DTM	51.517	7.61156
ALBANIA	5	TIA	41.4193	19.713	1082	SAW	40.9063	29.3173
ALBANIA	5	TIA	41.4193	19.713	550	FLR	43.8075	11.202
ALBANIA	5	TIA	41.4193	19.713	542	BRI	41.1386	16.7654
ALBANIA	5	TIA	41.4193	19.713	74	BRU	50.9006	4.48393
ALBANIA	5	TIA	41.4193	19.713	389	DUS	51.2875	6.76743
ALBANIA	5	TIA	41.4193	19.713	396	HAM	53.6336	9.99746
ALBANIA	5	TIA	41.4193	19.713	563	RMI	44.0192	12.6115
ALBANIA	5	TIA	41.4193	19.713	1102	KBP	50.3386	30.8946
ALBANIA	5	TIA	41.4193	19.713	551	GOA	44.4126	8.84485
ALBANIA	5	TIA	41.4193	19.713	392	FRA	50.0379	8.5625
ALBANIA	5	TIA	41.4193	19.713	560	PEG	43.0949	12.5026
ALBANIA	5	TIA	41.4193	19.713	458	BUD	47.4413	19.2537
ALBANIA	5	TIA	41.4193	19.713	541	AOI	43.6171	13.362
ALBANIA	5	TIA	41.4193	19.713	1137	STN	51.8862	0.238265
ALBANIA	5	TIA	41.4193	19.713	567	TRN	45.1965	7.64739
ALBANIA	5	TIA	41.4193	19.713	401	FMM	47.9869	10.2343
ALBANIA	5	TIA	41.4193	19.713	1135	LHR	51.4696	-0.454081
ALBANIA	5	TIA	41.4193	19.713	821	WAW	52.167	20.9683
ALBANIA	5	TIA	41.4193	19.713	1134	LGW	51.1539	-0.182535
ALBANIA	5	TIA	41.4193	19.713	360	ORY	48.7261	2.36447
ALBANIA	5	TIA	41.4193	19.713	1022	GVA	46.2369	6.10943
ALBANIA	5	TIA	41.4193	19.713	1025	ZRH	47.4612	8.55427
ALBANIA	5	TIA	41.4193	19.713	812	GDN	54.3792	18.4679
ALBANIA	5	TIA	41.4193	19.713	813	KTW	50.4728	19.0777
ALBANIA	5	TIA	41.4193	19.713	746	EIN	51.4572	5.39444
ALBANIA	5	TIA	41.4193	19.713	409	STR	48.6877	9.20596
ALBANIA	5	TIA	41.4193	19.713	75	CRL	50.4622	4.45738
ALBANIA	5	TIA	41.4193	19.713	271	PRG	50.1045	14.2635
ALBANIA	5	TIA	41.4193	19.713	568	TSF	45.6539	12.2015
ALBANIA	5	TIA	41.4193	19.713	386	CGN	50.8668	7.14189
ALBANIA	5	TIA	41.4193	19.713	931	PRN	42.5754	21.0297
ALBANIA	5	TIA	41.4193	19.713	774	OSL	60.1974	11.1004
ALBANIA	5	TIA	41.4193	19.713	923	RUH	24.9648	46.7016
ALGERIA	6	ALG	36.6982	3.20797	358	CDG	49.0282	2.54309
ALGERIA	6	ALG	36.6982	3.20797	360	ORY	48.7261	2.36447
ALGERIA	6	ALG	36.6982	3.20797	351	LYS	45.7235	5.08813
ALGERIA	6	ALG	36.6982	3.20797	352	MRS	43.4388	5.21356
ALGERIA	6	ALG	36.6982	3.20797	1069	TUN	36.8455	10.2198
ALGERIA	6	ALG	36.6982	3.20797	1081	IST	41.2611	28.7441
ALGERIA	6	ALG	36.6982	3.20797	721	CMN	33.3698	-7.58589
ALGERIA	6	ALG	36.6982	3.20797	1135	LHR	51.4696	-0.454081
ALGERIA	6	ALG	36.6982	3.20797	132	YUL	45.465	-73.7443
ALGERIA	6	ALG	36.6982	3.20797	348	LIL	50.567	3.10347
ALGERIA	6	ALG	36.6982	3.20797	965	BCN	41.2972	2.08368
ALGERIA	6	ALG	36.6982	3.20797	355	NTE	47.157	-1.60572
ALGERIA	6	ALG	36.6982	3.20797	1072	AYT	36.9036	30.8026
ALGERIA	6	ALG	36.6982	3.20797	371	TLS	43.629	1.36884
ALGERIA	6	ALG	36.6982	3.20797	298	CAI	30.1141	31.4011
ALGERIA	6	ALG	36.6982	3.20797	962	ALC	38.2855	-0.559455
ALGERIA	6	ALG	36.6982	3.20797	356	NCE	43.6599	7.21534
ALGERIA	6	ALG	36.6982	3.20797	834	DOH	25.2636	51.6145
ALGERIA	6	ALG	36.6982	3.20797	75	CRL	50.4622	4.45738
ALGERIA	6	ALG	36.6982	3.20797	369	SXB	48.5389	7.62437
ALGERIA	6	ALG	36.6982	3.20797	604	AMM	31.7233	35.9872
ALGERIA	6	ALG	36.6982	3.20797	1020	BSL	47.5995	7.5293
ALGERIA	6	ALG	36.6982	3.20797	354	MPL	43.5789	3.96597
ALGERIA	6	ALG	36.6982	3.20797	565	FCO	41.8013	12.2456
ALGERIA	6	ALG	36.6982	3.20797	676	NKC	18.2992	-15.9578
ALGERIA	6	ALG	36.6982	3.20797	927	DSS	14.6715	-17.0671
ALGERIA	6	ALG	36.6982	3.20797	976	MAD	40.4989	-3.56519
ALGERIA	6	ALG	36.6982	3.20797	1110	DXB	25.2535	55.3652
ALGERIA	6	ALG	36.6982	3.20797	74	BRU	50.9006	4.48393
ALGERIA	6	ALG	36.6982	3.20797	353	ETZ	48.9809	6.24461
ALGERIA	6	ALG	36.6982	3.20797	1022	GVA	46.2369	6.10943
ALGERIA	6	ALG	36.6982	3.20797	826	LIS	38.7758	-9.13511
ALGERIA	6	ALG	36.6982	3.20797	161	PEK	40.0805	116.604
ALGERIA	6	ALG	36.6982	3.20797	53	VIE	48.1111	16.5752
ALGERIA	6	ALG	36.6982	3.20797	555	MXP	45.6299	8.7257
ALGERIA	6	ALG	36.6982	3.20797	877	SVO	55.9744	37.4133
ALGERIA	6	ALG	36.6982	3.20797	392	FRA	50.0379	8.5625
ALGERIA	6	ALG	36.6982	3.20797	670	BKO	12.5422	-7.94257
ALGERIA	6	ALG	36.6982	3.20797	759	NIM	13.4825	2.18261
ALGERIA	6	ALG	36.6982	3.20797	987	VLC	39.4895	-0.477682
ALGERIA	6	ALG	36.6982	3.20797	632	BEY	33.8262	35.4922
ALGERIA	6	ALG	36.6982	3.20797	335	BOD	44.8295	-0.712744
ALGERIA	6	ALG	36.6982	3.20797	245	ABJ	5.25489	-3.93241
ALGERIA	6	ALG	36.6982	3.20797	980	PMI	39.5522	2.73599
ALGERIA	6	ALG	36.6982	3.20797	115	OUA	12.3532	-1.51258
ALGERIA	6	ALG	36.6982	3.20797	458	BUD	47.4413	19.2537
ALGERIA	6	ALG	36.6982	3.20797	1134	LGW	51.1539	-0.182535
ALGERIA	7	AAE	36.8251	7.82338	360	ORY	48.7261	2.36447
ALGERIA	7	AAE	36.8251	7.82338	358	CDG	49.0282	2.54309
ALGERIA	7	AAE	36.8251	7.82338	352	MRS	43.4388	5.21356
ALGERIA	7	AAE	36.8251	7.82338	1081	IST	41.2611	28.7441
ALGERIA	7	AAE	36.8251	7.82338	351	LYS	45.7235	5.08813
ALGERIA	8	BLJ	35.7557	6.30752	352	MRS	43.4388	5.21356
ALGERIA	8	BLJ	35.7557	6.30752	360	ORY	48.7261	2.36447
ALGERIA	8	BLJ	35.7557	6.30752	351	LYS	45.7235	5.08813
ALGERIA	8	BLJ	35.7557	6.30752	358	CDG	49.0282	2.54309
ALGERIA	9	BJA	36.7144	5.07208	360	ORY	48.7261	2.36447
ALGERIA	9	BJA	36.7144	5.07208	358	CDG	49.0282	2.54309
ALGERIA	9	BJA	36.7144	5.07208	351	LYS	45.7235	5.08813
ALGERIA	9	BJA	36.7144	5.07208	352	MRS	43.4388	5.21356
ALGERIA	9	BJA	36.7144	5.07208	348	LIL	50.567	3.10347
ALGERIA	10	BSK	34.792	5.73285	351	LYS	45.7235	5.08813
ALGERIA	10	BSK	34.792	5.73285	360	ORY	48.7261	2.36447
ALGERIA	10	BSK	34.792	5.73285	358	CDG	49.0282	2.54309
ALGERIA	11	CFK	36.2176	1.32519	352	MRS	43.4388	5.21356
ALGERIA	11	CFK	36.2176	1.32519	358	CDG	49.0282	2.54309
ALGERIA	12	CZL	36.2834	6.62249	360	ORY	48.7261	2.36447
ALGERIA	12	CZL	36.2834	6.62249	352	MRS	43.4388	5.21356
ALGERIA	12	CZL	36.2834	6.62249	351	LYS	45.7235	5.08813
ALGERIA	12	CZL	36.2834	6.62249	1020	BSL	47.5995	7.5293
ALGERIA	12	CZL	36.2834	6.62249	1081	IST	41.2611	28.7441
ALGERIA	12	CZL	36.2834	6.62249	369	SXB	48.5389	7.62437
ALGERIA	12	CZL	36.2834	6.62249	75	CRL	50.4622	4.45738
ALGERIA	12	CZL	36.2834	6.62249	353	ETZ	48.9809	6.24461
ALGERIA	12	CZL	36.2834	6.62249	356	NCE	43.6599	7.21534
ALGERIA	12	CZL	36.2834	6.62249	371	TLS	43.629	1.36884
ALGERIA	12	CZL	36.2834	6.62249	354	MPL	43.5789	3.96597
ALGERIA	12	CZL	36.2834	6.62249	358	CDG	49.0282	2.54309
ALGERIA	12	CZL	36.2834	6.62249	348	LIL	50.567	3.10347
ALGERIA	13	ELU	33.5109	6.78319	358	CDG	49.0282	2.54309
ALGERIA	14	GJL	36.7934	5.87923	352	MRS	43.4388	5.21356
ALGERIA	15	ORN	35.62	-0.604253	358	CDG	49.0282	2.54309
ALGERIA	15	ORN	35.62	-0.604253	360	ORY	48.7261	2.36447
ALGERIA	15	ORN	35.62	-0.604253	371	TLS	43.629	1.36884
ALGERIA	15	ORN	35.62	-0.604253	351	LYS	45.7235	5.08813
ALGERIA	15	ORN	35.62	-0.604253	962	ALC	38.2855	-0.559455
ALGERIA	15	ORN	35.62	-0.604253	352	MRS	43.4388	5.21356
ALGERIA	15	ORN	35.62	-0.604253	721	CMN	33.3698	-7.58589
ALGERIA	15	ORN	35.62	-0.604253	348	LIL	50.567	3.10347
ALGERIA	15	ORN	35.62	-0.604253	75	CRL	50.4622	4.45738
ALGERIA	15	ORN	35.62	-0.604253	355	NTE	47.157	-1.60572
ALGERIA	15	ORN	35.62	-0.604253	965	BCN	41.2972	2.08368
ALGERIA	15	ORN	35.62	-0.604253	354	MPL	43.5789	3.96597
ALGERIA	15	ORN	35.62	-0.604253	1069	TUN	36.8455	10.2198
ALGERIA	15	ORN	35.62	-0.604253	369	SXB	48.5389	7.62437
ALGERIA	15	ORN	35.62	-0.604253	363	PGF	42.7414	2.86997
ALGERIA	15	ORN	35.62	-0.604253	74	BRU	50.9006	4.48393
ALGERIA	15	ORN	35.62	-0.604253	1081	IST	41.2611	28.7441
ALGERIA	15	ORN	35.62	-0.604253	335	BOD	44.8295	-0.712744
ALGERIA	15	ORN	35.62	-0.604253	353	ETZ	48.9809	6.24461
ALGERIA	15	ORN	35.62	-0.604253	392	FRA	50.0379	8.5625
ALGERIA	15	ORN	35.62	-0.604253	976	MAD	40.4989	-3.56519
ALGERIA	16	QSF	36.1762	5.32872	351	LYS	45.7235	5.08813
ALGERIA	16	QSF	36.1762	5.32872	360	ORY	48.7261	2.36447
ALGERIA	16	QSF	36.1762	5.32872	352	MRS	43.4388	5.21356
ALGERIA	16	QSF	36.1762	5.32872	1069	TUN	36.8455	10.2198
ALGERIA	17	TLM	35.0121	-1.44848	360	ORY	48.7261	2.36447
ALGERIA	17	TLM	35.0121	-1.44848	352	MRS	43.4388	5.21356
ALGERIA	17	TLM	35.0121	-1.44848	351	LYS	45.7235	5.08813
ALGERIA	17	TLM	35.0121	-1.44848	348	LIL	50.567	3.10347
ALGERIA	17	TLM	35.0121	-1.44848	358	CDG	49.0282	2.54309
AMERICAN SAMOA	18	PPG	-14.328	-170.714	1165	HNL	21.3249	-157.925
ANGOLA	19	LAD	-8.8487	13.2371	826	LIS	38.7758	-9.13511
ANGOLA	19	LAD	-8.8487	13.2371	950	JNB	-26.1362	28.2423
ANGOLA	19	LAD	-8.8487	13.2371	1255	GRU	-23.4298	-46.4711
ANGOLA	19	LAD	-8.8487	13.2371	948	CPT	-33.9712	18.6028
ANGOLA	19	LAD	-8.8487	13.2371	312	ADD	8.98434	38.7963
ANGOLA	19	LAD	-8.8487	13.2371	1261	MPM	-25.9243	32.5743
ANGOLA	19	LAD	-8.8487	13.2371	742	WDH	-22.4873	17.4636
ANGOLA	19	LAD	-8.8487	13.2371	763	LOS	6.58109	3.32082
ANGOLA	19	LAD	-8.8487	13.2371	913	TMS	0.379586	6.71304
ANGOLA	19	LAD	-8.8487	13.2371	274	FIH	-4.38757	15.4471
ANGOLA	19	LAD	-8.8487	13.2371	358	CDG	49.0282	2.54309
ANGOLA	19	LAD	-8.8487	13.2371	375	LBV	0.458614	9.40987
ANGOLA	19	LAD	-8.8487	13.2371	74	BRU	50.9006	4.48393
ANGOLA	19	LAD	-8.8487	13.2371	392	FRA	50.0379	8.5625
ANGOLA	19	LAD	-8.8487	13.2371	622	NBO	-1.32224	36.9271
ANGOLA	19	LAD	-8.8487	13.2371	837	BZV	-4.25873	15.2515
ANGOLA	19	LAD	-8.8487	13.2371	834	DOH	25.2636	51.6145
ANGOLA	19	LAD	-8.8487	13.2371	1110	DXB	25.2535	55.3652
ANGUILLA	20	AXA	18.2066	-63.0517	936	SXM	18.0412	-63.1129
ANGUILLA	20	AXA	18.2066	-63.0517	1096	STT	18.3391	-64.9725
ANGUILLA	20	AXA	18.2066	-63.0517	833	SJU	18.4431	-66.0035
ANGUILLA	20	AXA	18.2066	-63.0517	992	SBH	17.9053	-62.8421
ANGUILLA	20	AXA	18.2066	-63.0517	285	DOM	15.5468	-61.3007
ANGUILLA	20	AXA	18.2066	-63.0517	994	NEV	17.2065	-62.5898
ANTIGUA & BARBUDA	21	ANU	17.1405	-61.792	1139	MNI	16.8025	-62.1757
ANTIGUA & BARBUDA	21	ANU	17.1405	-61.792	936	SXM	18.0412	-63.1129
ANTIGUA & BARBUDA	21	ANU	17.1405	-61.792	285	DOM	15.5468	-61.3007
ANTIGUA & BARBUDA	21	ANU	17.1405	-61.792	995	SKB	17.3112	-62.7168
ANTIGUA & BARBUDA	21	ANU	17.1405	-61.792	107	EIS	18.4452	-64.5392
ANTIGUA & BARBUDA	21	ANU	17.1405	-61.792	71	BGI	13.0809	-59.4875
ANTIGUA & BARBUDA	21	ANU	17.1405	-61.792	1060	POS	10.5979	-61.3386
ANTIGUA & BARBUDA	21	ANU	17.1405	-61.792	997	SLU	14.021	-60.9916
ANTIGUA & BARBUDA	21	ANU	17.1405	-61.792	1178	MIA	25.7962	-80.2867
ANTIGUA & BARBUDA	21	ANU	17.1405	-61.792	992	SBH	17.9053	-62.8421
ANTIGUA & BARBUDA	21	ANU	17.1405	-61.792	833	SJU	18.4431	-66.0035
ANTIGUA & BARBUDA	21	ANU	17.1405	-61.792	1096	STT	18.3391	-64.9725
ANTIGUA & BARBUDA	21	ANU	17.1405	-61.792	441	PTP	16.2692	-61.5279
ANTIGUA & BARBUDA	21	ANU	17.1405	-61.792	1184	JFK	40.6421	-73.7778
ANTIGUA & BARBUDA	21	ANU	17.1405	-61.792	571	KIN	17.9371	-76.7796
ANTIGUA & BARBUDA	21	ANU	17.1405	-61.792	1146	ATL	33.6406	-84.4277
ANTIGUA & BARBUDA	21	ANU	17.1405	-61.792	440	GND	12.008	-61.7843
ANTIGUA & BARBUDA	21	ANU	17.1405	-61.792	1093	PLS	21.7766	-72.2702
ANTIGUA & BARBUDA	21	ANU	17.1405	-61.792	1134	LGW	51.1539	-0.182535
ANTIGUA & BARBUDA	21	ANU	17.1405	-61.792	293	SDQ	18.431	-69.6765
ANTIGUA & BARBUDA	21	ANU	17.1405	-61.792	555	MXP	45.6299	8.7257
ANTIGUA & BARBUDA	21	ANU	17.1405	-61.792	140	YYZ	43.6802	-79.6244
ANTIGUA & BARBUDA	21	ANU	17.1405	-61.792	1183	EWR	40.6899	-74.1737
ANTIGUA & BARBUDA	21	ANU	17.1405	-61.792	1135	LHR	51.4696	-0.454081
ANTIGUA & BARBUDA	21	ANU	17.1405	-61.792	1061	TAB	11.1532	-60.8391
ANTIGUA & BARBUDA	21	ANU	17.1405	-61.792	1151	CLT	35.2142	-80.4947
ARGENTINA	22	EZE	-34.815	-58.5364	745	AMS	52.3104	4.76862
ARGENTINA	22	EZE	-34.815	-58.5364	976	MAD	40.4989	-3.56519
ARGENTINA	22	EZE	-34.815	-58.5364	1178	MIA	25.7962	-80.2867
ARGENTINA	22	EZE	-34.815	-58.5364	358	CDG	49.0282	2.54309
ARGENTINA	22	EZE	-34.815	-58.5364	565	FCO	41.8013	12.2456
ARGENTINA	22	EZE	-34.815	-58.5364	797	ASU	-25.2411	-57.5142
ARGENTINA	22	EZE	-34.815	-58.5364	159	SCL	-53.0015	-70.8466
ARGENTINA	22	EZE	-34.815	-58.5364	1184	JFK	40.6421	-73.7778
ARGENTINA	22	EZE	-34.815	-58.5364	1252	BSB	-15.8696	-47.9161
ARGENTINA	22	EZE	-34.815	-58.5364	1175	LAX	33.942	-118.409
ARGENTINA	22	EZE	-34.815	-58.5364	93	CNF	-19.6329	-43.9673
ARGENTINA	22	EZE	-34.815	-58.5364	1253	VCP	-23.0086	-47.1373
ARGENTINA	22	EZE	-34.815	-58.5364	99	MCZ	-9.51372	-35.7912
ARGENTINA	22	EZE	-34.815	-58.5364	682	CUN	21.0422	-86.874
ARGENTINA	22	EZE	-34.815	-58.5364	392	FRA	50.0379	8.5625
ARGENTINA	22	EZE	-34.815	-58.5364	1157	DFW	32.8996	-97.04
ARGENTINA	22	EZE	-34.815	-58.5364	1216	MVD	-34.8372	-56.0153
ARGENTINA	22	EZE	-34.815	-58.5364	96	FOR	-3.77798	-38.5316
ARGENTINA	22	EZE	-34.815	-58.5364	102	POA	-29.9928	-51.1724
ARGENTINA	22	EZE	-34.815	-58.5364	105	GIG	-22.8069	-43.259
ARGENTINA	22	EZE	-34.815	-58.5364	289	PUJ	18.565	-68.3689
ARGENTINA	22	EZE	-34.815	-58.5364	257	HAV	22.9981	-82.4078
ARGENTINA	22	EZE	-34.815	-58.5364	232	BOG	4.70012	-74.1482
ARGENTINA	22	EZE	-34.815	-58.5364	106	SSA	-12.9115	-38.3294
ARGENTINA	22	EZE	-34.815	-58.5364	98	JPA	-7.14585	-34.9498
ARGENTINA	22	EZE	-34.815	-58.5364	254	CCC	22.4648	-78.3259
ARGENTINA	22	EZE	-34.815	-58.5364	802	LIM	-12.0235	-77.1124
ARGENTINA	22	EZE	-34.815	-58.5364	84	VVI	-17.6442	-63.1383
ARGENTINA	22	EZE	-34.815	-58.5364	965	BCN	41.2972	2.08368
ARGENTINA	22	EZE	-34.815	-58.5364	94	CWB	-25.5318	-49.1729
ARGENTINA	22	EZE	-34.815	-58.5364	1135	LHR	51.4696	-0.454081
ARGENTINA	22	EZE	-34.815	-58.5364	696	MEX	19.4363	-99.0707
ARGENTINA	22	EZE	-34.815	-58.5364	1254	FLN	-27.67	-48.5448
ARGENTINA	22	EZE	-34.815	-58.5364	101	NAT	-5.77231	-35.3592
ARGENTINA	22	EZE	-34.815	-58.5364	1025	ZRH	47.4612	8.55427
ARGENTINA	22	EZE	-34.815	-58.5364	795	PTY	9.06787	-79.385
ARGENTINA	22	EZE	-34.815	-58.5364	1255	GRU	-23.4298	-46.4711
ARGENTINA	22	EZE	-34.815	-58.5364	1146	ATL	33.6406	-84.4277
ARGENTINA	22	EZE	-34.815	-58.5364	104	REC	-8.12546	-34.9265
ARGENTINA	22	EZE	-34.815	-58.5364	1166	IAH	29.9873	-95.3389
ARGENTINA	22	EZE	-34.815	-58.5364	103	BPS	-16.4404	-39.0793
ARGENTINA	23	COR	-31.3156	-64.2156	797	ASU	-25.2411	-57.5142
ARGENTINA	23	COR	-31.3156	-64.2156	795	PTY	9.06787	-79.385
ARGENTINA	23	COR	-31.3156	-64.2156	1255	GRU	-23.4298	-46.4711
ARGENTINA	23	COR	-31.3156	-64.2156	314	MPN	-51.8219	-58.4535
ARGENTINA	23	COR	-31.3156	-64.2156	103	BPS	-16.4404	-39.0793
ARGENTINA	23	COR	-31.3156	-64.2156	106	SSA	-12.9115	-38.3294
ARGENTINA	23	COR	-31.3156	-64.2156	1254	FLN	-27.67	-48.5448
ARGENTINA	23	COR	-31.3156	-64.2156	105	GIG	-22.8069	-43.259
ARGENTINA	23	COR	-31.3156	-64.2156	802	LIM	-12.0235	-77.1124
ARGENTINA	24	EPA	-34.6066	-58.6019	159	SCL	-53.0015	-70.8466
ARGENTINA	24	EPA	-34.6066	-58.6019	797	ASU	-25.2411	-57.5142
ARGENTINA	24	EPA	-34.6066	-58.6019	105	GIG	-22.8069	-43.259
ARGENTINA	24	EPA	-34.6066	-58.6019	1255	GRU	-23.4298	-46.4711
ARGENTINA	25	MDZ	-32.8277	-68.7992	1255	GRU	-23.4298	-46.4711
ARGENTINA	25	MDZ	-32.8277	-68.7992	802	LIM	-12.0235	-77.1124
ARGENTINA	25	MDZ	-32.8277	-68.7992	795	PTY	9.06787	-79.385
ARGENTINA	25	MDZ	-32.8277	-68.7992	159	SCL	-53.0015	-70.8466
ARGENTINA	26	RGL	-51.6132	-69.3058	314	MPN	-51.8219	-58.4535
ARGENTINA	26	RGL	-51.6132	-69.3058	158	PUQ	-53.0015	-70.8467
ARGENTINA	27	ROS	-32.9174	-60.7828	802	LIM	-12.0235	-77.1124
ARGENTINA	27	ROS	-32.9174	-60.7828	1217	PDP	-34.8603	-55.0958
ARGENTINA	27	ROS	-32.9174	-60.7828	795	PTY	9.06787	-79.385
ARGENTINA	27	ROS	-32.9174	-60.7828	105	GIG	-22.8069	-43.259
ARGENTINA	28	SLA	-24.8444	-65.4774	84	VVI	-17.6442	-63.1383
ARGENTINA	28	SLA	-24.8444	-65.4774	802	LIM	-12.0235	-77.1124
ARGENTINA	28	SLA	-24.8444	-65.4774	795	PTY	9.06787	-79.385
ARGENTINA	29	BRC	-41.1457	-71.1604	1255	GRU	-23.4298	-46.4711
ARGENTINA	30	TUC	-26.8332	-65.1087	802	LIM	-12.0235	-77.1124
ARMENIA	31	LWN	40.7509	43.8549	878	VKO	55.5997	37.272
ARMENIA	31	LWN	40.7509	43.8549	401	FMM	47.9869	10.2343
ARMENIA	32	EVN	40.1488	44.3974	380	TBS	41.6697	44.9644
ARMENIA	32	EVN	40.1488	44.3974	878	VKO	55.5997	37.272
ARMENIA	32	EVN	40.1488	44.3974	870	KRR	45.0341	39.1407
ARMENIA	32	EVN	40.1488	44.3974	877	SVO	55.9744	37.4133
ARMENIA	32	EVN	40.1488	44.3974	898	AER	43.4493	39.941
ARMENIA	32	EVN	40.1488	44.3974	1112	SHJ	25.3282	55.5123
ARMENIA	32	EVN	40.1488	44.3974	525	IKA	35.4096	51.1555
ARMENIA	32	EVN	40.1488	44.3974	1256	ROV	47.4929	39.9293
ARMENIA	32	EVN	40.1488	44.3974	876	DME	55.4107	37.9017
ARMENIA	32	EVN	40.1488	44.3974	72	MSQ	53.8889	28.0343
ARMENIA	32	EVN	40.1488	44.3974	539	TLV	32.0132	34.8846
ARMENIA	32	EVN	40.1488	44.3974	53	VIE	48.1111	16.5752
ARMENIA	32	EVN	40.1488	44.3974	875	MRV	44.219	43.0882
ARMENIA	32	EVN	40.1488	44.3974	1102	KBP	50.3386	30.8946
ARMENIA	32	EVN	40.1488	44.3974	907	VOZ	51.8133	39.2261
ARMENIA	32	EVN	40.1488	44.3974	896	KUF	53.514	50.1569
ARMENIA	32	EVN	40.1488	44.3974	351	LYS	45.7235	5.08813
ARMENIA	32	EVN	40.1488	44.3974	903	UFA	54.5657	55.8876
ARMENIA	32	EVN	40.1488	44.3974	1110	DXB	25.2535	55.3652
ARMENIA	32	EVN	40.1488	44.3974	834	DOH	25.2636	51.6145
ARMENIA	32	EVN	40.1488	44.3974	1104	ODS	46.4305	30.6777
ARMENIA	32	EVN	40.1488	44.3974	909	SVX	56.7453	60.803
ARMENIA	32	EVN	40.1488	44.3974	894	LED	59.8034	30.2677
ARMENIA	32	EVN	40.1488	44.3974	1257	KFL	26.0743	-80.1505
ARMENIA	32	EVN	40.1488	44.3974	640	VNO	54.6416	25.3055
ARMENIA	32	EVN	40.1488	44.3974	265	LCA	34.8726	33.6217
ARMENIA	32	EVN	40.1488	44.3974	358	CDG	49.0282	2.54309
ARMENIA	32	EVN	40.1488	44.3974	303	SSH	27.9837	34.3884
ARMENIA	32	EVN	40.1488	44.3974	553	BGY	45.6694	9.70392
ARMENIA	32	EVN	40.1488	44.3974	632	BEY	33.8262	35.4922
ARMENIA	32	EVN	40.1488	44.3974	74	BRU	50.9006	4.48393
ARMENIA	32	EVN	40.1488	44.3974	883	GOJ	56.2199	43.7901
ARMENIA	32	EVN	40.1488	44.3974	299	HRG	27.181	33.8084
ARMENIA	32	EVN	40.1488	44.3974	266	PFO	34.7178	32.4831
ARMENIA	32	EVN	40.1488	44.3974	1258	VOG	48.7861	44.3458
ARMENIA	32	EVN	40.1488	44.3974	564	CIA	41.7994	12.5928
ARMENIA	32	EVN	40.1488	44.3974	431	SKG	40.5208	22.9725
ARMENIA	32	EVN	40.1488	44.3974	891	PEE	57.9176	56.0299
ARMENIA	32	EVN	40.1488	44.3974	899	STW	45.1136	42.105
ARMENIA	32	EVN	40.1488	44.3974	382	SXF	52.3647	13.51
ARMENIA	32	EVN	40.1488	44.3974	414	ATH	37.9348	23.9462
ARMENIA	32	EVN	40.1488	44.3974	821	WAW	52.167	20.9683
ARMENIA	32	EVN	40.1488	44.3974	885	OVB	55.0117	82.6523
ARUBA	33	AUA	12.503	-70.0076	263	CUR	12.189	-68.9612
ARUBA	33	AUA	12.503	-70.0076	1184	JFK	40.6421	-73.7778
ARUBA	33	AUA	12.503	-70.0076	745	AMS	52.3104	4.76862
ARUBA	33	AUA	12.503	-70.0076	1149	BOS	42.3659	-71.0088
ARUBA	33	AUA	12.503	-70.0076	1183	EWR	40.6899	-74.1737
ARUBA	33	AUA	12.503	-70.0076	1178	MIA	25.7962	-80.2867
ARUBA	33	AUA	12.503	-70.0076	1146	ATL	33.6406	-84.4277
ARUBA	33	AUA	12.503	-70.0076	1151	CLT	35.2142	-80.4947
ARUBA	33	AUA	12.503	-70.0076	292	JBQ	18.577	-69.9815
ARUBA	33	AUA	12.503	-70.0076	232	BOG	4.70012	-74.1482
ARUBA	33	AUA	12.503	-70.0076	1004	PBM	5.45694	-55.198
ARUBA	33	AUA	12.503	-70.0076	1160	FLL	26.0749	-80.1483
ARUBA	33	AUA	12.503	-70.0076	140	YYZ	43.6802	-79.6244
ARUBA	33	AUA	12.503	-70.0076	795	PTY	9.06787	-79.385
ARUBA	33	AUA	12.503	-70.0076	1153	ORD	41.98	-87.9093
ARUBA	33	AUA	12.503	-70.0076	936	SXM	18.0412	-63.1129
ARUBA	33	AUA	12.503	-70.0076	1157	DFW	32.8996	-97.04
ARUBA	33	AUA	12.503	-70.0076	1191	PHL	39.8734	-75.2438
ARUBA	33	AUA	12.503	-70.0076	1166	IAH	29.9873	-95.3389
ARUBA	33	AUA	12.503	-70.0076	1185	LGA	40.7777	-73.872
ARUBA	33	AUA	12.503	-70.0076	1180	MSP	44.8852	-93.2214
ARUBA	33	AUA	12.503	-70.0076	231	BAQ	10.8863	-74.7773
ARUBA	33	AUA	12.503	-70.0076	149	BON	12.1349	-68.2771
ARUBA	33	AUA	12.503	-70.0076	289	PUJ	18.565	-68.3689
ARUBA	33	AUA	12.503	-70.0076	1148	BWI	39.1776	-76.6679
ARUBA	33	AUA	12.503	-70.0076	295	UIO	-0.124313	-78.3608
ARUBA	33	AUA	12.503	-70.0076	1213	IAD	38.9532	-77.456
ARUBA	33	AUA	12.503	-70.0076	236	MDE	6.1719	-75.4278
AUSTRALIA	34	ADL	-34.9457	138.534	934	SIN	1.36425	103.992
AUSTRALIA	34	ADL	-34.9457	138.534	657	KUL	2.73227	101.707
AUSTRALIA	34	ADL	-34.9457	138.534	834	DOH	25.2636	51.6145
AUSTRALIA	34	ADL	-34.9457	138.534	170	CAN	23.3994	113.307
AUSTRALIA	34	ADL	-34.9457	138.534	496	DPS	-8.74506	115.166
AUSTRALIA	34	ADL	-34.9457	138.534	1110	DXB	25.2535	55.3652
AUSTRALIA	34	ADL	-34.9457	138.534	751	AKL	-37.0081	174.785
AUSTRALIA	34	ADL	-34.9457	138.534	457	HKG	22.3085	113.919
AUSTRALIA	35	BNE	-27.3926	153.122	796	POM	-9.44113	147.218
AUSTRALIA	35	BNE	-27.3926	153.122	751	AKL	-37.0081	174.785
AUSTRALIA	35	BNE	-27.3926	153.122	941	HIR	-9.42677	160.048
AUSTRALIA	35	BNE	-27.3926	153.122	834	DOH	25.2636	51.6145
AUSTRALIA	35	BNE	-27.3926	153.122	912	APW	-13.8269	-172.009
AUSTRALIA	35	BNE	-27.3926	153.122	934	SIN	1.36425	103.992
AUSTRALIA	35	BNE	-27.3926	153.122	1110	DXB	25.2535	55.3652
AUSTRALIA	35	BNE	-27.3926	153.122	457	HKG	22.3085	113.919
AUSTRALIA	35	BNE	-27.3926	153.122	206	SZX	22.639	113.814
AUSTRALIA	35	BNE	-27.3926	153.122	766	NLK	-29.0413	167.943
AUSTRALIA	35	BNE	-27.3926	153.122	1032	TPE	25.0803	121.235
AUSTRALIA	35	BNE	-27.3926	153.122	743	INU	-0.542331	166.918
AUSTRALIA	35	BNE	-27.3926	153.122	657	KUL	2.73227	101.707
AUSTRALIA	35	BNE	-27.3926	153.122	203	PVG	31.1456	121.808
AUSTRALIA	35	BNE	-27.3926	153.122	755	ROT	-38.1083	176.317
AUSTRALIA	35	BNE	-27.3926	153.122	600	HND	35.5493	139.781
AUSTRALIA	35	BNE	-27.3926	153.122	752	CHC	-43.4882	172.538
AUSTRALIA	35	BNE	-27.3926	153.122	316	NAN	-17.753	177.451
AUSTRALIA	35	BNE	-27.3926	153.122	958	ICN	37.4469	126.451
AUSTRALIA	35	BNE	-27.3926	153.122	750	NOU	-22.0122	166.22
AUSTRALIA	35	BNE	-27.3926	153.122	1108	AUH	24.4429	54.6503
AUSTRALIA	35	BNE	-27.3926	153.122	756	WLG	-41.3275	174.807
AUSTRALIA	35	BNE	-27.3926	153.122	142	YVR	49.195	-123.179
AUSTRALIA	35	BNE	-27.3926	153.122	1045	BKK	13.6896	100.751
AUSTRALIA	35	BNE	-27.3926	153.122	170	CAN	23.3994	113.307
AUSTRALIA	35	BNE	-27.3926	153.122	809	MNL	14.513	121.017
AUSTRALIA	35	BNE	-27.3926	153.122	1203	SFO	37.6218	-122.379
AUSTRALIA	35	BNE	-27.3926	153.122	1165	HNL	21.3249	-157.925
AUSTRALIA	35	BNE	-27.3926	153.122	942	MUA	-8.32525	157.263
AUSTRALIA	35	BNE	-27.3926	153.122	599	NRT	35.7726	140.393
AUSTRALIA	35	BNE	-27.3926	153.122	496	DPS	-8.74506	115.166
AUSTRALIA	35	BNE	-27.3926	153.122	1228	VLI	-17.6997	168.318
AUSTRALIA	35	BNE	-27.3926	153.122	1153	ORD	41.98	-87.9093
AUSTRALIA	35	BNE	-27.3926	153.122	753	DUD	-45.9265	170.203
AUSTRALIA	35	BNE	-27.3926	153.122	1175	LAX	33.942	-118.409
AUSTRALIA	35	BNE	-27.3926	153.122	754	ZQN	-45.0193	168.746
AUSTRALIA	35	BNE	-27.3926	153.122	109	BWN	4.94392	114.932
AUSTRALIA	36	CNS	-16.8786	145.75	796	POM	-9.44113	147.218
AUSTRALIA	36	CNS	-16.8786	145.75	206	SZX	22.639	113.814
AUSTRALIA	36	CNS	-16.8786	145.75	496	DPS	-8.74506	115.166
AUSTRALIA	36	CNS	-16.8786	145.75	934	SIN	1.36425	103.992
AUSTRALIA	36	CNS	-16.8786	145.75	751	AKL	-37.0081	174.785
AUSTRALIA	36	CNS	-16.8786	145.75	593	KIX	34.4319	135.23
AUSTRALIA	36	CNS	-16.8786	145.75	599	NRT	35.7726	140.393
AUSTRALIA	37	CBR	-35.3042	149.194	934	SIN	1.36425	103.992
AUSTRALIA	38	XCH	-10.4517	105.689	229	CCK	-12.1871	96.8293
AUSTRALIA	39	DRW	-12.4168	130.883	1056	DIL	-8.54858	125.527
AUSTRALIA	39	DRW	-12.4168	130.883	496	DPS	-8.74506	115.166
AUSTRALIA	39	DRW	-12.4168	130.883	934	SIN	1.36425	103.992
AUSTRALIA	40	OOL	-28.1671	153.509	756	WLG	-41.3275	174.807
AUSTRALIA	40	OOL	-28.1671	153.509	934	SIN	1.36425	103.992
AUSTRALIA	40	OOL	-28.1671	153.509	752	CHC	-43.4882	172.538
AUSTRALIA	40	OOL	-28.1671	153.509	958	ICN	37.4469	126.451
AUSTRALIA	40	OOL	-28.1671	153.509	754	ZQN	-45.0193	168.746
AUSTRALIA	40	OOL	-28.1671	153.509	751	AKL	-37.0081	174.785
AUSTRALIA	40	OOL	-28.1671	153.509	657	KUL	2.73227	101.707
AUSTRALIA	40	OOL	-28.1671	153.509	599	NRT	35.7726	140.393
AUSTRALIA	41	MEL	-37.6705	144.841	751	AKL	-37.0081	174.785
AUSTRALIA	41	MEL	-37.6705	144.841	834	DOH	25.2636	51.6145
AUSTRALIA	41	MEL	-37.6705	144.841	1110	DXB	25.2535	55.3652
AUSTRALIA	41	MEL	-37.6705	144.841	1108	AUH	24.4429	54.6503
AUSTRALIA	41	MEL	-37.6705	144.841	457	HKG	22.3085	113.919
AUSTRALIA	41	MEL	-37.6705	144.841	109	BWN	4.94392	114.932
AUSTRALIA	41	MEL	-37.6705	144.841	934	SIN	1.36425	103.992
AUSTRALIA	41	MEL	-37.6705	144.841	486	DEL	28.5654	77.1202
AUSTRALIA	41	MEL	-37.6705	144.841	657	KUL	2.73227	101.707
AUSTRALIA	41	MEL	-37.6705	144.841	173	HAK	19.9392	110.462
AUSTRALIA	41	MEL	-37.6705	144.841	497	CGK	-6.12727	106.654
AUSTRALIA	41	MEL	-37.6705	144.841	1032	TPE	25.0803	121.235
AUSTRALIA	41	MEL	-37.6705	144.841	809	MNL	14.513	121.017
AUSTRALIA	41	MEL	-37.6705	144.841	170	CAN	23.3994	113.307
AUSTRALIA	41	MEL	-37.6705	144.841	316	NAN	-17.753	177.451
AUSTRALIA	41	MEL	-37.6705	144.841	1052	HKT	8.1119	98.3064
AUSTRALIA	41	MEL	-37.6705	144.841	599	NRT	35.7726	140.393
AUSTRALIA	41	MEL	-37.6705	144.841	1165	HNL	21.3249	-157.925
AUSTRALIA	41	MEL	-37.6705	144.841	218	XMN	24.5396	118.133
AUSTRALIA	41	MEL	-37.6705	144.841	167	CKG	29.7204	106.642
AUSTRALIA	41	MEL	-37.6705	144.841	161	PEK	40.0805	116.604
AUSTRALIA	41	MEL	-37.6705	144.841	754	ZQN	-45.0193	168.746
AUSTRALIA	41	MEL	-37.6705	144.841	159	SCL	-53.0015	-70.8466
AUSTRALIA	41	MEL	-37.6705	144.841	1045	BKK	13.6896	100.751
AUSTRALIA	41	MEL	-37.6705	144.841	1175	LAX	33.942	-118.409
AUSTRALIA	41	MEL	-37.6705	144.841	1239	SGN	10.8191	106.659
AUSTRALIA	41	MEL	-37.6705	144.841	206	SZX	22.639	113.814
AUSTRALIA	41	MEL	-37.6705	144.841	1228	VLI	-17.6997	168.318
AUSTRALIA	41	MEL	-37.6705	144.841	750	NOU	-22.0122	166.22
AUSTRALIA	41	MEL	-37.6705	144.841	600	HND	35.5493	139.781
AUSTRALIA	41	MEL	-37.6705	144.841	756	WLG	-41.3275	174.807
AUSTRALIA	41	MEL	-37.6705	144.841	752	CHC	-43.4882	172.538
AUSTRALIA	41	MEL	-37.6705	144.841	142	YVR	49.195	-123.179
AUSTRALIA	41	MEL	-37.6705	144.841	991	CMB	7.18037	79.8849
AUSTRALIA	41	MEL	-37.6705	144.841	166	CTU	30.5691	103.95
AUSTRALIA	41	MEL	-37.6705	144.841	203	PVG	31.1456	121.808
AUSTRALIA	41	MEL	-37.6705	144.841	172	KWE	26.5414	106.8
AUSTRALIA	41	MEL	-37.6705	144.841	1203	SFO	37.6218	-122.379
AUSTRALIA	41	MEL	-37.6705	144.841	496	DPS	-8.74506	115.166
AUSTRALIA	41	MEL	-37.6705	144.841	199	TAO	36.2673	120.383
AUSTRALIA	42	AVV	-38.0275	144.472	657	KUL	2.73227	101.707
AUSTRALIA	43	NAC	-36.981	140.724	285	DOM	15.5468	-61.3007
AUSTRALIA	44	PER	-31.9396	115.966	496	DPS	-8.74506	115.166
AUSTRALIA	44	PER	-31.9396	115.966	834	DOH	25.2636	51.6145
AUSTRALIA	44	PER	-31.9396	115.966	657	KUL	2.73227	101.707
AUSTRALIA	44	PER	-31.9396	115.966	934	SIN	1.36425	103.992
AUSTRALIA	44	PER	-31.9396	115.966	457	HKG	22.3085	113.919
AUSTRALIA	44	PER	-31.9396	115.966	229	CCK	-12.1871	96.8293
AUSTRALIA	44	PER	-31.9396	115.966	1110	DXB	25.2535	55.3652
AUSTRALIA	44	PER	-31.9396	115.966	497	CGK	-6.12727	106.654
AUSTRALIA	44	PER	-31.9396	115.966	677	MRU	-20.4339	57.6794
AUSTRALIA	44	PER	-31.9396	115.966	1045	BKK	13.6896	100.751
AUSTRALIA	44	PER	-31.9396	115.966	950	JNB	-26.1362	28.2423
AUSTRALIA	44	PER	-31.9396	115.966	809	MNL	14.513	121.017
AUSTRALIA	44	PER	-31.9396	115.966	1135	LHR	51.4696	-0.454081
AUSTRALIA	44	PER	-31.9396	115.966	599	NRT	35.7726	140.393
AUSTRALIA	44	PER	-31.9396	115.966	655	BKI	5.92364	116.051
AUSTRALIA	44	PER	-31.9396	115.966	170	CAN	23.3994	113.307
AUSTRALIA	45	PHE	-20.3771	118.632	496	DPS	-8.74506	115.166
AUSTRALIA	45	PHE	-20.3771	118.632	751	AKL	-37.0081	174.785
AUSTRALIA	46	SYD	-33.9418	151.176	834	DOH	25.2636	51.6145
AUSTRALIA	46	SYD	-33.9418	151.176	1032	TPE	25.0803	121.235
AUSTRALIA	46	SYD	-33.9418	151.176	1203	SFO	37.6218	-122.379
AUSTRALIA	46	SYD	-33.9418	151.176	457	HKG	22.3085	113.919
AUSTRALIA	46	SYD	-33.9418	151.176	934	SIN	1.36425	103.992
AUSTRALIA	46	SYD	-33.9418	151.176	1110	DXB	25.2535	55.3652
AUSTRALIA	46	SYD	-33.9418	151.176	991	CMB	7.18037	79.8849
AUSTRALIA	46	SYD	-33.9418	151.176	600	HND	35.5493	139.781
AUSTRALIA	46	SYD	-33.9418	151.176	1108	AUH	24.4429	54.6503
AUSTRALIA	46	SYD	-33.9418	151.176	1175	LAX	33.942	-118.409
AUSTRALIA	46	SYD	-33.9418	151.176	750	NOU	-22.0122	166.22
AUSTRALIA	46	SYD	-33.9418	151.176	912	APW	-13.8269	-172.009
AUSTRALIA	46	SYD	-33.9418	151.176	203	PVG	31.1456	121.808
AUSTRALIA	46	SYD	-33.9418	151.176	486	DEL	28.5654	77.1202
AUSTRALIA	46	SYD	-33.9418	151.176	173	HAK	19.9392	110.462
AUSTRALIA	46	SYD	-33.9418	151.176	958	ICN	37.4469	126.451
AUSTRALIA	46	SYD	-33.9418	151.176	170	CAN	23.3994	113.307
AUSTRALIA	46	SYD	-33.9418	151.176	766	NLK	-29.0413	167.943
AUSTRALIA	46	SYD	-33.9418	151.176	497	CGK	-6.12727	106.654
AUSTRALIA	46	SYD	-33.9418	151.176	218	XMN	24.5396	118.133
AUSTRALIA	46	SYD	-33.9418	151.176	657	KUL	2.73227	101.707
AUSTRALIA	46	SYD	-33.9418	151.176	164	CSX	28.1976	113.221
AUSTRALIA	46	SYD	-33.9418	151.176	1239	SGN	10.8191	106.659
AUSTRALIA	46	SYD	-33.9418	151.176	809	MNL	14.513	121.017
AUSTRALIA	46	SYD	-33.9418	151.176	1157	DFW	32.8996	-97.04
AUSTRALIA	46	SYD	-33.9418	151.176	317	SUV	-18.0452	178.56
AUSTRALIA	46	SYD	-33.9418	151.176	496	DPS	-8.74506	115.166
AUSTRALIA	46	SYD	-33.9418	151.176	316	NAN	-17.753	177.451
AUSTRALIA	46	SYD	-33.9418	151.176	199	TAO	36.2673	120.383
AUSTRALIA	46	SYD	-33.9418	151.176	183	KMG	25.0973	102.929
AUSTRALIA	46	SYD	-33.9418	151.176	1238	HAN	21.219	105.805
AUSTRALIA	46	SYD	-33.9418	151.176	166	CTU	30.5691	103.95
AUSTRALIA	46	SYD	-33.9418	151.176	159	SCL	-53.0015	-70.8466
AUSTRALIA	46	SYD	-33.9418	151.176	1045	BKK	13.6896	100.751
AUSTRALIA	46	SYD	-33.9418	151.176	1166	IAH	29.9873	-95.3389
AUSTRALIA	46	SYD	-33.9418	151.176	206	SZX	22.639	113.814
AUSTRALIA	46	SYD	-33.9418	151.176	950	JNB	-26.1362	28.2423
AUSTRALIA	46	SYD	-33.9418	151.176	195	NKG	31.7343	118.872
AUSTRALIA	46	SYD	-33.9418	151.176	1058	TBU	-21.2407	-175.141
AUSTRALIA	46	SYD	-33.9418	151.176	593	KIX	34.4319	135.23
AUSTRALIA	46	SYD	-33.9418	151.176	161	PEK	40.0805	116.604
AUSTRALIA	46	SYD	-33.9418	151.176	1228	VLI	-17.6997	168.318
AUSTRALIA	46	SYD	-33.9418	151.176	796	POM	-9.44113	147.218
AUSTRALIA	46	SYD	-33.9418	151.176	1052	HKT	8.1119	98.3064
AUSTRALIA	46	SYD	-33.9418	151.176	142	YVR	49.195	-123.179
AUSTRALIA	46	SYD	-33.9418	151.176	595	CTS	42.7819	141.689
AUSTRALIA	46	SYD	-33.9418	151.176	1165	HNL	21.3249	-157.925
AUSTRALIA	46	SYD	-33.9418	151.176	751	AKL	-37.0081	174.785
AUSTRALIA	46	SYD	-33.9418	151.176	752	CHC	-43.4882	172.538
AUSTRALIA	46	SYD	-33.9418	151.176	756	WLG	-41.3275	174.807
AUSTRALIA	46	SYD	-33.9418	151.176	242	RAR	-21.2011	-159.807
AUSTRALIA	46	SYD	-33.9418	151.176	754	ZQN	-45.0193	168.746
AUSTRALIA	47	WTB	-27.5652	151.795	457	HKG	22.3085	113.919
AUSTRIA	48	GRZ	46.9944	15.4402	403	MUC	48.351	11.7769
AUSTRIA	48	GRZ	46.9944	15.4402	392	FRA	50.0379	8.5625
AUSTRIA	48	GRZ	46.9944	15.4402	389	DUS	51.2875	6.76743
AUSTRIA	48	GRZ	46.9944	15.4402	409	STR	48.6877	9.20596
AUSTRIA	48	GRZ	46.9944	15.4402	383	TXL	52.5593	13.2893
AUSTRIA	48	GRZ	46.9944	15.4402	417	HER	35.3411	25.1739
AUSTRIA	48	GRZ	46.9944	15.4402	427	RHO	36.4034	28.0911
AUSTRIA	48	GRZ	46.9944	15.4402	113	VAR	43.2368	27.8278
AUSTRIA	48	GRZ	46.9944	15.4402	381	BER	52.365	13.5126
AUSTRIA	48	GRZ	46.9944	15.4402	745	AMS	52.3104	4.76862
AUSTRIA	48	GRZ	46.9944	15.4402	1025	ZRH	47.4612	8.55427
AUSTRIA	48	GRZ	46.9944	15.4402	1081	IST	41.2611	28.7441
AUSTRIA	48	GRZ	46.9944	15.4402	980	PMI	39.5522	2.73599
AUSTRIA	49	INN	47.2573	11.3509	392	FRA	50.0379	8.5625
AUSTRIA	49	INN	47.2573	11.3509	383	TXL	52.5593	13.2893
AUSTRIA	49	INN	47.2573	11.3509	745	AMS	52.3104	4.76862
AUSTRIA	49	INN	47.2573	11.3509	1134	LGW	51.1539	-0.182535
AUSTRIA	49	INN	47.2573	11.3509	1138	MAN	53.3589	-2.27316
AUSTRIA	49	INN	47.2573	11.3509	641	LUX	49.629	6.21517
AUSTRIA	49	INN	47.2573	11.3509	1117	BHX	52.4525	-1.74411
AUSTRIA	49	INN	47.2573	11.3509	1137	STN	51.8862	0.238265
AUSTRIA	49	INN	47.2573	11.3509	749	RTM	51.9556	4.44105
AUSTRIA	49	INN	47.2573	11.3509	1119	BRS	51.3837	-2.71303
AUSTRIA	49	INN	47.2573	11.3509	318	HEL	60.3257	24.9501
AUSTRIA	49	INN	47.2573	11.3509	1136	LTN	51.8764	-0.371575
AUSTRIA	49	INN	47.2573	11.3509	876	DME	55.4107	37.9017
AUSTRIA	49	INN	47.2573	11.3509	73	ANR	51.1886	4.46219
AUSTRIA	49	INN	47.2573	11.3509	1014	ARN	59.6485	17.9228
AUSTRIA	49	INN	47.2573	11.3509	381	BER	52.365	13.5126
AUSTRIA	49	INN	47.2573	11.3509	746	EIN	51.4572	5.39444
AUSTRIA	49	INN	47.2573	11.3509	396	HAM	53.6336	9.99746
AUSTRIA	49	INN	47.2573	11.3509	1102	KBP	50.3386	30.8946
AUSTRIA	49	INN	47.2573	11.3509	1135	LHR	51.4696	-0.454081
AUSTRIA	50	KLU	46.6499	14.3256	386	CGN	50.8668	7.14189
AUSTRIA	50	KLU	46.6499	14.3256	980	PMI	39.5522	2.73599
AUSTRIA	50	KLU	46.6499	14.3256	383	TXL	52.5593	13.2893
AUSTRIA	50	KLU	46.6499	14.3256	1134	LGW	51.1539	-0.182535
AUSTRIA	50	KLU	46.6499	14.3256	749	RTM	51.9556	4.44105
AUSTRIA	50	KLU	46.6499	14.3256	381	BER	52.365	13.5126
AUSTRIA	51	LNZ	48.2391	14.1928	392	FRA	50.0379	8.5625
AUSTRIA	51	LNZ	48.2391	14.1928	389	DUS	51.2875	6.76743
AUSTRIA	51	LNZ	48.2391	14.1928	417	HER	35.3411	25.1739
AUSTRIA	51	LNZ	48.2391	14.1928	427	RHO	36.4034	28.0911
AUSTRIA	51	LNZ	48.2391	14.1928	980	PMI	39.5522	2.73599
AUSTRIA	52	SZG	47.7948	13.0029	392	FRA	50.0379	8.5625
AUSTRIA	52	SZG	47.7948	13.0029	980	PMI	39.5522	2.73599
AUSTRIA	52	SZG	47.7948	13.0029	1081	IST	41.2611	28.7441
AUSTRIA	52	SZG	47.7948	13.0029	382	SXF	52.3647	13.51
AUSTRIA	52	SZG	47.7948	13.0029	389	DUS	51.2875	6.76743
AUSTRIA	52	SZG	47.7948	13.0029	1137	STN	51.8862	0.238265
AUSTRIA	52	SZG	47.7948	13.0029	396	HAM	53.6336	9.99746
AUSTRIA	52	SZG	47.7948	13.0029	930	INI	43.3386	21.8682
AUSTRIA	52	SZG	47.7948	13.0029	641	LUX	49.629	6.21517
AUSTRIA	52	SZG	47.7948	13.0029	417	HER	35.3411	25.1739
AUSTRIA	52	SZG	47.7948	13.0029	1088	OGU	40.9655	38.082
AUSTRIA	52	SZG	47.7948	13.0029	422	KGS	36.8008	27.0905
AUSTRIA	52	SZG	47.7948	13.0029	416	CFU	39.6086	19.9127
AUSTRIA	52	SZG	47.7948	13.0029	557	OLB	40.8998	9.51629
AUSTRIA	52	SZG	47.7948	13.0029	928	BEG	44.8208	20.2929
AUSTRIA	52	SZG	47.7948	13.0029	841	OTP	44.5705	26.0849
AUSTRIA	52	SZG	47.7948	13.0029	836	SKP	41.9636	21.6231
AUSTRIA	52	SZG	47.7948	13.0029	88	TZL	44.4637	18.7085
AUSTRIA	52	SZG	47.7948	13.0029	1101	IEV	50.4132	30.4434
AUSTRIA	52	SZG	47.7948	13.0029	745	AMS	52.3104	4.76862
AUSTRIA	52	SZG	47.7948	13.0029	876	DME	55.4107	37.9017
AUSTRIA	52	SZG	47.7948	13.0029	318	HEL	60.3257	24.9501
AUSTRIA	52	SZG	47.7948	13.0029	923	RUH	24.9648	46.7016
AUSTRIA	52	SZG	47.7948	13.0029	1143	EMA	52.8293	-1.33136
AUSTRIA	52	SZG	47.7948	13.0029	774	OSL	60.1974	11.1004
AUSTRIA	52	SZG	47.7948	13.0029	1117	BHX	52.4525	-1.74411
AUSTRIA	52	SZG	47.7948	13.0029	631	RIX	56.9235	23.9785
AUSTRIA	52	SZG	47.7948	13.0029	971	LPA	27.9332	-15.3872
AUSTRIA	52	SZG	47.7948	13.0029	1131	LPL	53.3359	-2.85475
AUSTRIA	52	SZG	47.7948	13.0029	310	TLL	59.4141	24.8337
AUSTRIA	52	SZG	47.7948	13.0029	1135	LHR	51.4696	-0.454081
AUSTRIA	52	SZG	47.7948	13.0029	746	EIN	51.4572	5.39444
AUSTRIA	52	SZG	47.7948	13.0029	539	TLV	32.0132	34.8846
AUSTRIA	52	SZG	47.7948	13.0029	1138	MAN	53.3589	-2.27316
AUSTRIA	52	SZG	47.7948	13.0029	381	BER	52.365	13.5126
AUSTRIA	52	SZG	47.7948	13.0029	1116	BFS	54.6628	-6.21626
AUSTRIA	52	SZG	47.7948	13.0029	1140	NCL	55.0372	-1.70934
AUSTRIA	52	SZG	47.7948	13.0029	769	BGO	60.2919	5.22199
AUSTRIA	52	SZG	47.7948	13.0029	281	CPH	55.6204	12.6493
AUSTRIA	52	SZG	47.7948	13.0029	383	TXL	52.5593	13.2893
AUSTRIA	52	SZG	47.7948	13.0029	552	SUF	38.9104	16.2468
AUSTRIA	52	SZG	47.7948	13.0029	1119	BRS	51.3837	-2.71303
AUSTRIA	52	SZG	47.7948	13.0029	749	RTM	51.9556	4.44105
AUSTRIA	52	SZG	47.7948	13.0029	1130	LBA	53.8678	-1.6608
AUSTRIA	52	SZG	47.7948	13.0029	386	CGN	50.8668	7.14189
AUSTRIA	52	SZG	47.7948	13.0029	776	SVG	58.8848	5.6339
AUSTRIA	52	SZG	47.7948	13.0029	1134	LGW	51.1539	-0.182535
AUSTRIA	52	SZG	47.7948	13.0029	533	DUB	53.4264	-6.24897
AUSTRIA	52	SZG	47.7948	13.0029	986	TFS	28.0468	-16.5723
AUSTRIA	52	SZG	47.7948	13.0029	1136	LTN	51.8764	-0.371575
AUSTRIA	52	SZG	47.7948	13.0029	1124	EDI	55.9509	-3.3609
AUSTRIA	53	VIE	48.1111	16.5752	1025	ZRH	47.4612	8.55427
AUSTRIA	53	VIE	48.1111	16.5752	383	TXL	52.5593	13.2893
AUSTRIA	53	VIE	48.1111	16.5752	392	FRA	50.0379	8.5625
AUSTRIA	53	VIE	48.1111	16.5752	403	MUC	48.351	11.7769
AUSTRIA	53	VIE	48.1111	16.5752	358	CDG	49.0282	2.54309
AUSTRIA	53	VIE	48.1111	16.5752	565	FCO	41.8013	12.2456
AUSTRIA	53	VIE	48.1111	16.5752	539	TLV	32.0132	34.8846
AUSTRIA	53	VIE	48.1111	16.5752	389	DUS	51.2875	6.76743
AUSTRIA	53	VIE	48.1111	16.5752	745	AMS	52.3104	4.76862
AUSTRIA	53	VIE	48.1111	16.5752	555	MXP	45.6299	8.7257
AUSTRIA	53	VIE	48.1111	16.5752	396	HAM	53.6336	9.99746
AUSTRIA	53	VIE	48.1111	16.5752	821	WAW	52.167	20.9683
AUSTRIA	53	VIE	48.1111	16.5752	928	BEG	44.8208	20.2929
AUSTRIA	53	VIE	48.1111	16.5752	841	OTP	44.5705	26.0849
AUSTRIA	53	VIE	48.1111	16.5752	414	ATH	37.9348	23.9462
AUSTRIA	53	VIE	48.1111	16.5752	74	BRU	50.9006	4.48393
AUSTRIA	53	VIE	48.1111	16.5752	409	STR	48.6877	9.20596
AUSTRIA	53	VIE	48.1111	16.5752	112	SOF	42.6939	23.408
AUSTRIA	53	VIE	48.1111	16.5752	386	CGN	50.8668	7.14189
AUSTRIA	53	VIE	48.1111	16.5752	1260	ZAG	45.7414	16.0672
AUSTRIA	53	VIE	48.1111	16.5752	1135	LHR	51.4696	-0.454081
AUSTRIA	53	VIE	48.1111	16.5752	281	CPH	55.6204	12.6493
AUSTRIA	53	VIE	48.1111	16.5752	1082	SAW	40.9063	29.3173
AUSTRIA	53	VIE	48.1111	16.5752	271	PRG	50.1045	14.2635
AUSTRIA	53	VIE	48.1111	16.5752	965	BCN	41.2972	2.08368
AUSTRIA	53	VIE	48.1111	16.5752	5	TIA	41.4193	19.713
AUSTRIA	53	VIE	48.1111	16.5752	976	MAD	40.4989	-3.56519
AUSTRIA	53	VIE	48.1111	16.5752	265	LCA	34.8726	33.6217
AUSTRIA	53	VIE	48.1111	16.5752	1081	IST	41.2611	28.7441
AUSTRIA	53	VIE	48.1111	16.5752	569	VCE	45.5058	12.3405
AUSTRIA	53	VIE	48.1111	16.5752	1014	ARN	59.6485	17.9228
AUSTRIA	53	VIE	48.1111	16.5752	1022	GVA	46.2369	6.10943
AUSTRIA	53	VIE	48.1111	16.5752	431	SKG	40.5208	22.9725
AUSTRIA	53	VIE	48.1111	16.5752	671	MLA	35.8522	14.4864
AUSTRIA	53	VIE	48.1111	16.5752	931	PRN	42.5754	21.0297
AUSTRIA	53	VIE	48.1111	16.5752	356	NCE	43.6599	7.21534
AUSTRIA	53	VIE	48.1111	16.5752	826	LIS	38.7758	-9.13511
AUSTRIA	53	VIE	48.1111	16.5752	1102	KBP	50.3386	30.8946
AUSTRIA	53	VIE	48.1111	16.5752	1020	BSL	47.5995	7.5293
AUSTRIA	53	VIE	48.1111	16.5752	717	TGD	42.3778	19.2463
AUSTRIA	53	VIE	48.1111	16.5752	87	SJJ	43.8256	18.3384
AUSTRIA	53	VIE	48.1111	16.5752	458	BUD	47.4413	19.2537
AUSTRIA	53	VIE	48.1111	16.5752	397	HAJ	52.4642	9.68561
AUSTRIA	53	VIE	48.1111	16.5752	113	VAR	43.2368	27.8278
AUSTRIA	53	VIE	48.1111	16.5752	387	DTM	51.517	7.61156
AUSTRIA	53	VIE	48.1111	16.5752	641	LUX	49.629	6.21517
AUSTRIA	53	VIE	48.1111	16.5752	543	BLQ	44.5359	11.2876
AUSTRIA	53	VIE	48.1111	16.5752	980	PMI	39.5522	2.73599
AUSTRIA	53	VIE	48.1111	16.5752	1137	STN	51.8862	0.238265
AUSTRIA	53	VIE	48.1111	16.5752	631	RIX	56.9235	23.9785
AUSTRIA	53	VIE	48.1111	16.5752	938	KSC	48.6732	21.2374
AUSTRIA	53	VIE	48.1111	16.5752	72	MSQ	53.8889	28.0343
AUSTRIA	53	VIE	48.1111	16.5752	774	OSL	60.1974	11.1004
AUSTRIA	53	VIE	48.1111	16.5752	298	CAI	30.1141	31.4011
AUSTRIA	53	VIE	48.1111	16.5752	251	SPU	43.5372	16.2989
AUSTRIA	53	VIE	48.1111	16.5752	533	DUB	53.4264	-6.24897
AUSTRIA	53	VIE	48.1111	16.5752	550	FLR	43.8075	11.202
AUSTRIA	53	VIE	48.1111	16.5752	836	SKP	41.9636	21.6231
AUSTRIA	53	VIE	48.1111	16.5752	553	BGY	45.6694	9.70392
AUSTRIA	53	VIE	48.1111	16.5752	977	AGP	36.6771	-4.49366
AUSTRIA	53	VIE	48.1111	16.5752	714	KIV	46.935	28.9348
AUSTRIA	53	VIE	48.1111	16.5752	246	DBV	42.5606	18.262
AUSTRIA	53	VIE	48.1111	16.5752	556	NAP	40.8851	14.2891
AUSTRIA	53	VIE	48.1111	16.5752	252	ZAD	44.0969	15.3526
AUSTRIA	53	VIE	48.1111	16.5752	351	LYS	45.7235	5.08813
AUSTRIA	53	VIE	48.1111	16.5752	542	BRI	41.1386	16.7654
AUSTRIA	53	VIE	48.1111	16.5752	1071	ESB	40.1234	32.9916
AUSTRIA	53	VIE	48.1111	16.5752	987	VLC	39.4895	-0.477682
AUSTRIA	53	VIE	48.1111	16.5752	876	DME	55.4107	37.9017
AUSTRIA	53	VIE	48.1111	16.5752	962	ALC	38.2855	-0.559455
AUSTRIA	53	VIE	48.1111	16.5752	1101	IEV	50.4132	30.4434
AUSTRIA	53	VIE	48.1111	16.5752	1024	ACH	47.486	9.56036
AUSTRIA	53	VIE	48.1111	16.5752	310	TLL	59.4141	24.8337
AUSTRIA	53	VIE	48.1111	16.5752	540	AHO	40.6354	8.29632
AUSTRIA	53	VIE	48.1111	16.5752	416	CFU	39.6086	19.9127
AUSTRIA	53	VIE	48.1111	16.5752	814	KRK	50.0771	19.7884
AUSTRIA	53	VIE	48.1111	16.5752	318	HEL	60.3257	24.9501
AUSTRIA	53	VIE	48.1111	16.5752	1134	LGW	51.1539	-0.182535
AUSTRIA	53	VIE	48.1111	16.5752	834	DOH	25.2636	51.6145
AUSTRIA	53	VIE	48.1111	16.5752	75	CRL	50.4622	4.45738
AUSTRIA	53	VIE	48.1111	16.5752	546	CTA	37.4688	15.0657
AUSTRIA	53	VIE	48.1111	16.5752	828	OPO	41.2422	-8.67861
AUSTRIA	53	VIE	48.1111	16.5752	385	BRE	52.3162	10.5606
AUSTRIA	53	VIE	48.1111	16.5752	405	NUE	49.4968	11.0795
AUSTRIA	53	VIE	48.1111	16.5752	525	IKA	35.4096	51.1555
AUSTRIA	53	VIE	48.1111	16.5752	1153	ORD	41.98	-87.9093
AUSTRIA	53	VIE	48.1111	16.5752	1183	EWR	40.6899	-74.1737
AUSTRIA	53	VIE	48.1111	16.5752	640	VNO	54.6416	25.3055
AUSTRIA	53	VIE	48.1111	16.5752	847	SBZ	45.7872	24.0898
AUSTRIA	53	VIE	48.1111	16.5752	427	RHO	36.4034	28.0911
AUSTRIA	53	VIE	48.1111	16.5752	1072	AYT	36.9036	30.8026
AUSTRIA	53	VIE	48.1111	16.5752	1213	IAD	38.9532	-77.456
AUSTRIA	53	VIE	48.1111	16.5752	1136	LTN	51.8764	-0.371575
AUSTRIA	53	VIE	48.1111	16.5752	415	CHQ	35.5411	24.1407
AUSTRIA	53	VIE	48.1111	16.5752	1103	LWO	49.8142	23.9613
AUSTRIA	53	VIE	48.1111	16.5752	417	HER	35.3411	25.1739
AUSTRIA	53	VIE	48.1111	16.5752	1112	SHJ	25.3282	55.5123
AUSTRIA	53	VIE	48.1111	16.5752	312	ADD	8.98434	38.7963
AUSTRIA	53	VIE	48.1111	16.5752	746	EIN	51.4572	5.39444
AUSTRIA	53	VIE	48.1111	16.5752	1138	MAN	53.3589	-2.27316
AUSTRIA	53	VIE	48.1111	16.5752	32	EVN	40.1488	44.3974
AUSTRIA	53	VIE	48.1111	16.5752	1104	ODS	46.4305	30.6777
AUSTRIA	53	VIE	48.1111	16.5752	462	KEF	63.9816	-22.6277
AUSTRIA	53	VIE	48.1111	16.5752	433	ZTH	37.7557	20.887
AUSTRIA	53	VIE	48.1111	16.5752	1124	EDI	55.9509	-3.3609
AUSTRIA	53	VIE	48.1111	16.5752	400	LEJ	51.4223	12.2209
AUSTRIA	53	VIE	48.1111	16.5752	1083	ADB	38.2942	27.154
AUSTRIA	53	VIE	48.1111	16.5752	1045	BKK	13.6896	100.751
AUSTRIA	53	VIE	48.1111	16.5752	1119	BRS	51.3837	-2.71303
AUSTRIA	53	VIE	48.1111	16.5752	1016	NYO	58.7887	16.9154
AUSTRIA	53	VIE	48.1111	16.5752	824	FAO	37.0173	-7.96942
AUSTRIA	53	VIE	48.1111	16.5752	1110	DXB	25.2535	55.3652
AUSTRIA	53	VIE	48.1111	16.5752	986	TFS	28.0468	-16.5723
AUSTRIA	53	VIE	48.1111	16.5752	835	OHD	41.1818	20.7454
AUSTRIA	53	VIE	48.1111	16.5752	88	TZL	44.4637	18.7085
AUSTRIA	53	VIE	48.1111	16.5752	132	YUL	45.465	-73.7443
AUSTRIA	53	VIE	48.1111	16.5752	1117	BHX	52.4525	-1.74411
AUSTRIA	53	VIE	48.1111	16.5752	1098	DNK	48.3691	35.0937
AUSTRIA	53	VIE	48.1111	16.5752	599	NRT	35.7726	140.393
AUSTRIA	53	VIE	48.1111	16.5752	529	EBL	36.2334	43.9547
AUSTRIA	53	VIE	48.1111	16.5752	1184	JFK	40.6421	-73.7778
AUSTRIA	53	VIE	48.1111	16.5752	604	AMM	31.7233	35.9872
AUSTRIA	53	VIE	48.1111	16.5752	845	IAS	47.1774	27.6175
AUSTRIA	53	VIE	48.1111	16.5752	894	LED	59.8034	30.2677
AUSTRIA	53	VIE	48.1111	16.5752	203	PVG	31.1456	121.808
AUSTRIA	53	VIE	48.1111	16.5752	110	BOJ	42.5653	27.5131
AUSTRIA	53	VIE	48.1111	16.5752	379	KUT	42.1824	42.4658
AUSTRIA	53	VIE	48.1111	16.5752	983	SDR	43.4262	-3.82191
AUSTRIA	53	VIE	48.1111	16.5752	359	BVA	49.4543	2.111
AUSTRIA	53	VIE	48.1111	16.5752	969	CDT	40.2054	0.0679689
AUSTRIA	53	VIE	48.1111	16.5752	299	HRG	27.181	33.8084
AUSTRIA	53	VIE	48.1111	16.5752	545	CAG	39.2512	9.05568
AUSTRIA	53	VIE	48.1111	16.5752	280	BLL	55.7411	9.15686
AUSTRIA	53	VIE	48.1111	16.5752	536	SNN	52.6943	-8.91864
AUSTRIA	53	VIE	48.1111	16.5752	842	CLJ	46.7828	23.6888
AUSTRIA	53	VIE	48.1111	16.5752	973	IBZ	38.8749	1.37114
AUSTRIA	53	VIE	48.1111	16.5752	382	SXF	52.3647	13.51
AUSTRIA	53	VIE	48.1111	16.5752	558	PMO	38.1813	13.1011
AUSTRIA	53	VIE	48.1111	16.5752	1084	ASR	38.7663	35.4822
AUSTRIA	53	VIE	48.1111	16.5752	985	SVQ	37.4207	-5.89219
AUSTRIA	53	VIE	48.1111	16.5752	335	BOD	44.8295	-0.712744
AUSTRIA	53	VIE	48.1111	16.5752	1099	HRK	49.9221	36.282
AUSTRIA	53	VIE	48.1111	16.5752	429	JTR	36.4012	25.4778
AUSTRIA	53	VIE	48.1111	16.5752	929	KVO	43.8284	20.5825
AUSTRIA	53	VIE	48.1111	16.5752	930	INI	43.3386	21.8682
AUSTRIA	53	VIE	48.1111	16.5752	1175	LAX	33.942	-118.409
AUSTRIA	53	VIE	48.1111	16.5752	486	DEL	28.5654	77.1202
AUSTRIA	53	VIE	48.1111	16.5752	1007	GOT	57.669	12.292
AUSTRIA	53	VIE	48.1111	16.5752	161	PEK	40.0805	116.604
AUSTRIA	53	VIE	48.1111	16.5752	812	GDN	54.3792	18.4679
AUSTRIA	53	VIE	48.1111	16.5752	1107	OZH	47.8744	35.301
AUSTRIA	53	VIE	48.1111	16.5752	920	JED	21.6626	39.1731
AUSTRIA	53	VIE	48.1111	16.5752	848	SCV	47.6873	26.353
AUSTRIA	53	VIE	48.1111	16.5752	1069	TUN	36.8455	10.2198
AUSTRIA	53	VIE	48.1111	16.5752	424	JMK	37.4343	25.3463
AUSTRIA	53	VIE	48.1111	16.5752	1089	SZF	41.2596	36.5575
AUSTRIA	53	VIE	48.1111	16.5752	426	PVK	38.9311	20.7722
AUSTRIA	53	VIE	48.1111	16.5752	206	SZX	22.639	113.814
AUSTRIA	53	VIE	48.1111	16.5752	1065	MIR	35.761	10.7564
AUSTRIA	53	VIE	48.1111	16.5752	210	URC	43.9078	87.4741
AUSTRIA	53	VIE	48.1111	16.5752	422	KGS	36.8008	27.0905
AUSTRIA	53	VIE	48.1111	16.5752	419	AOK	35.4219	27.1493
AUSTRIA	53	VIE	48.1111	16.5752	178	HET	40.8556	111.821
AUSTRIA	53	VIE	48.1111	16.5752	430	JSI	39.1787	23.5007
AUSTRIA	53	VIE	48.1111	16.5752	421	EFL	38.1199	20.5047
AUSTRIA	53	VIE	48.1111	16.5752	418	KLX	38.9608	-94.3755
AUSTRIA	53	VIE	48.1111	16.5752	6	ALG	36.6982	3.20797
AUSTRIA	53	VIE	48.1111	16.5752	625	KWI	29.2407	47.9711
AUSTRIA	53	VIE	48.1111	16.5752	958	ICN	37.4469	126.451
AUSTRIA	53	VIE	48.1111	16.5752	923	RUH	24.9648	46.7016
AUSTRIA	53	VIE	48.1111	16.5752	380	TBS	41.6697	44.9644
AUSTRIA	53	VIE	48.1111	16.5752	1032	TPE	25.0803	121.235
AUSTRIA	53	VIE	48.1111	16.5752	843	CND	44.3504	28.4816
AUSTRIA	53	VIE	48.1111	16.5752	968	BIO	43.3024	-2.9106
AUSTRIA	53	VIE	48.1111	16.5752	877	SVO	55.9744	37.4133
AUSTRIA	53	VIE	48.1111	16.5752	381	BER	52.365	13.5126
AUSTRIA	53	VIE	48.1111	16.5752	825	FNC	32.6956	-16.7758
AUSTRIA	53	VIE	48.1111	16.5752	560	PEG	43.0949	12.5026
AUSTRIA	53	VIE	48.1111	16.5752	85	BNX	44.9334	17.304
AUSTRIA	53	VIE	48.1111	16.5752	669	MLE	4.18839	73.5285
AUSTRIA	53	VIE	48.1111	16.5752	978	MAH	39.8636	4.22081
AUSTRIA	53	VIE	48.1111	16.5752	544	BDS	40.6566	17.9456
AUSTRIA	53	VIE	48.1111	16.5752	725	RAK	31.6021	-8.02488
AUSTRIA	53	VIE	48.1111	16.5752	1130	LBA	53.8678	-1.6608
AUSTRIA	53	VIE	48.1111	16.5752	563	RMI	44.0192	12.6115
AUSTRIA	53	VIE	48.1111	16.5752	432	VOL	39.2206	22.7937
AUSTRIA	53	VIE	48.1111	16.5752	557	OLB	40.8998	9.51629
AUSTRIA	53	VIE	48.1111	16.5752	323	LPP	61.0449	28.1565
AUSTRIA	53	VIE	48.1111	16.5752	749	RTM	51.9556	4.44105
AUSTRIA	53	VIE	48.1111	16.5752	632	BEY	33.8262	35.4922
AUSTRIA	53	VIE	48.1111	16.5752	775	TRF	59.1824	10.2575
AUSTRIA	53	VIE	48.1111	16.5752	721	CMN	33.3698	-7.58589
AUSTRIA	53	VIE	48.1111	16.5752	428	SMI	37.6909	26.9067
AUSTRIA	53	VIE	48.1111	16.5752	1070	ADA	36.9829	35.2968
AUSTRIA	53	VIE	48.1111	16.5752	1108	AUH	24.4429	54.6503
AUSTRIA	53	VIE	48.1111	16.5752	970	FUE	28.4486	-13.8658
AUSTRIA	53	VIE	48.1111	16.5752	822	WMI	52.4497	20.6521
AUSTRIA	53	VIE	48.1111	16.5752	990	ZAZ	41.6637	-1.00526
AUSTRIA	53	VIE	48.1111	16.5752	878	VKO	55.5997	37.272
AUSTRIA	53	VIE	48.1111	16.5752	140	YYZ	43.6802	-79.6244
AUSTRIA	53	VIE	48.1111	16.5752	420	KVA	40.9222	24.6224
AUSTRIA	53	VIE	48.1111	16.5752	1073	BJV	37.2492	27.6639
AUSTRIA	53	VIE	48.1111	16.5752	922	MED	24.5551	39.7139
AUSTRIA	53	VIE	48.1111	16.5752	404	FMO	52.1326	7.69172
AUSTRIA	53	VIE	48.1111	16.5752	948	CPT	-33.9712	18.6028
AUSTRIA	53	VIE	48.1111	16.5752	1126	GLA	55.8692	-4.43441
AUSTRIA	53	VIE	48.1111	16.5752	1100	KHE	46.6726	32.5082
AUSTRIA	53	VIE	48.1111	16.5752	355	NTE	47.157	-1.60572
AUSTRIA	53	VIE	48.1111	16.5752	1074	DLM	36.7181	28.7943
AUSTRIA	53	VIE	48.1111	16.5752	677	MRU	-20.4339	57.6794
AUSTRIA	53	VIE	48.1111	16.5752	1140	NCL	55.0372	-1.70934
AUSTRIA	53	VIE	48.1111	16.5752	552	SUF	38.9104	16.2468
AUSTRIA	53	VIE	48.1111	16.5752	413	GPA	38.1509	21.4262
AUSTRIA	53	VIE	48.1111	16.5752	1143	EMA	52.8293	-1.33136
AUSTRIA	53	VIE	48.1111	16.5752	971	LPA	27.9332	-15.3872
AUSTRIA	53	VIE	48.1111	16.5752	600	HND	35.5493	139.781
AUSTRIA	53	VIE	48.1111	16.5752	352	MRS	43.4388	5.21356
AUSTRIA	53	VIE	48.1111	16.5752	1131	LPL	53.3359	-2.85475
AZERBAIJAN	54	GYD	40.4655	50.0579	1112	SHJ	25.3282	55.5123
AZERBAIJAN	54	GYD	40.4655	50.0579	625	KWI	29.2407	47.9711
AZERBAIJAN	54	GYD	40.4655	50.0579	879	ZIA	55.5625	38.1185
AZERBAIJAN	54	GYD	40.4655	50.0579	380	TBS	41.6697	44.9644
AZERBAIJAN	54	GYD	40.4655	50.0579	606	SCO	43.8573	51.0893
AZERBAIJAN	54	GYD	40.4655	50.0579	894	LED	59.8034	30.2677
AZERBAIJAN	54	GYD	40.4655	50.0579	1110	DXB	25.2535	55.3652
AZERBAIJAN	54	GYD	40.4655	50.0579	1081	IST	41.2611	28.7441
AZERBAIJAN	54	GYD	40.4655	50.0579	1256	ROV	47.4929	39.9293
AZERBAIJAN	54	GYD	40.4655	50.0579	779	MCT	23.6011	58.2876
AZERBAIJAN	54	GYD	40.4655	50.0579	834	DOH	25.2636	51.6145
AZERBAIJAN	54	GYD	40.4655	50.0579	871	KJA	56.1774	92.482
AZERBAIJAN	54	GYD	40.4655	50.0579	909	SVX	56.7453	60.803
AZERBAIJAN	54	GYD	40.4655	50.0579	896	KUF	53.514	50.1569
AZERBAIJAN	54	GYD	40.4655	50.0579	72	MSQ	53.8889	28.0343
AZERBAIJAN	54	GYD	40.4655	50.0579	458	BUD	47.4413	19.2537
AZERBAIJAN	54	GYD	40.4655	50.0579	525	IKA	35.4096	51.1555
AZERBAIJAN	54	GYD	40.4655	50.0579	522	MHD	36.2284	59.6431
AZERBAIJAN	54	GYD	40.4655	50.0579	524	TBZ	38.1223	46.245
AZERBAIJAN	54	GYD	40.4655	50.0579	902	TJM	57.182	65.3515
AZERBAIJAN	54	GYD	40.4655	50.0579	900	SGC	61.3402	73.4086
AZERBAIJAN	54	GYD	40.4655	50.0579	903	UFA	54.5657	55.8876
AZERBAIJAN	54	GYD	40.4655	50.0579	1102	KBP	50.3386	30.8946
AZERBAIJAN	54	GYD	40.4655	50.0579	608	ALA	43.3505	77.0243
AZERBAIJAN	54	GYD	40.4655	50.0579	1071	ESB	40.1234	32.9916
AZERBAIJAN	54	GYD	40.4655	50.0579	878	VKO	55.5997	37.272
AZERBAIJAN	54	GYD	40.4655	50.0579	875	MRV	44.219	43.0882
AZERBAIJAN	54	GYD	40.4655	50.0579	1108	AUH	24.4429	54.6503
AZERBAIJAN	54	GYD	40.4655	50.0579	965	BCN	41.2972	2.08368
AZERBAIJAN	54	GYD	40.4655	50.0579	358	CDG	49.0282	2.54309
AZERBAIJAN	54	GYD	40.4655	50.0579	161	PEK	40.0805	116.604
AZERBAIJAN	54	GYD	40.4655	50.0579	378	BUS	41.6076	41.611
AZERBAIJAN	54	GYD	40.4655	50.0579	1073	BJV	37.2492	27.6639
AZERBAIJAN	54	GYD	40.4655	50.0579	112	SOF	42.6939	23.408
AZERBAIJAN	54	GYD	40.4655	50.0579	1074	DLM	36.7181	28.7943
AZERBAIJAN	54	GYD	40.4655	50.0579	917	ELQ	26.3065	43.7692
AZERBAIJAN	54	GYD	40.4655	50.0579	539	TLV	32.0132	34.8846
AZERBAIJAN	54	GYD	40.4655	50.0579	1225	TAS	41.2511	69.2649
AZERBAIJAN	54	GYD	40.4655	50.0579	920	JED	21.6626	39.1731
AZERBAIJAN	54	GYD	40.4655	50.0579	1083	ADB	38.2942	27.154
AZERBAIJAN	54	GYD	40.4655	50.0579	1135	LHR	51.4696	-0.454081
AZERBAIJAN	54	GYD	40.4655	50.0579	865	KZN	55.6082	49.2817
AZERBAIJAN	54	GYD	40.4655	50.0579	210	URC	43.9078	87.4741
AZERBAIJAN	54	GYD	40.4655	50.0579	1079	GZP	36.3009	32.3014
AZERBAIJAN	54	GYD	40.4655	50.0579	877	SVO	55.9744	37.4133
AZERBAIJAN	54	GYD	40.4655	50.0579	851	ASF	46.2877	48.0036
AZERBAIJAN	54	GYD	40.4655	50.0579	1072	AYT	36.9036	30.8026
AZERBAIJAN	54	GYD	40.4655	50.0579	1104	ODS	46.4305	30.6777
AZERBAIJAN	54	GYD	40.4655	50.0579	885	OVB	55.0117	82.6523
AZERBAIJAN	54	GYD	40.4655	50.0579	67	BAH	26.2691	50.6347
AZERBAIJAN	54	GYD	40.4655	50.0579	383	TXL	52.5593	13.2893
AZERBAIJAN	54	GYD	40.4655	50.0579	271	PRG	50.1045	14.2635
AZERBAIJAN	54	GYD	40.4655	50.0579	923	RUH	24.9648	46.7016
AZERBAIJAN	54	GYD	40.4655	50.0579	916	DMM	26.4722	49.7997
AZERBAIJAN	54	GYD	40.4655	50.0579	392	FRA	50.0379	8.5625
AZERBAIJAN	54	GYD	40.4655	50.0579	718	TIV	42.4048	18.7229
AZERBAIJAN	54	GYD	40.4655	50.0579	1082	SAW	40.9063	29.3173
AZERBAIJAN	54	GYD	40.4655	50.0579	1103	LWO	49.8142	23.9613
AZERBAIJAN	54	GYD	40.4655	50.0579	1184	JFK	40.6421	-73.7778
AZERBAIJAN	54	GYD	40.4655	50.0579	1099	HRK	49.9221	36.282
AZERBAIJAN	54	GYD	40.4655	50.0579	555	MXP	45.6299	8.7257
AZERBAIJAN	54	GYD	40.4655	50.0579	876	DME	55.4107	37.9017
AZERBAIJAN	55	KVD	40.7398	46.301	876	DME	55.4107	37.9017
AZERBAIJAN	55	KVD	40.7398	46.301	894	LED	59.8034	30.2677
AZERBAIJAN	55	KVD	40.7398	46.301	1081	IST	41.2611	28.7441
AZERBAIJAN	55	KVD	40.7398	46.301	878	VKO	55.5997	37.272
AZERBAIJAN	56	LLK	38.7419	48.8232	876	DME	55.4107	37.9017
AZERBAIJAN	56	LLK	38.7419	48.8232	878	VKO	55.5997	37.272
AZERBAIJAN	57	NAJ	39.1889	45.4584	878	VKO	55.5997	37.272
AZERBAIJAN	57	NAJ	39.1889	45.4584	1081	IST	41.2611	28.7441
AZERBAIJAN	58	GBB	40.827	47.7142	878	VKO	55.5997	37.272
BAHAMAS	59	BIM	25.7658	-79.2502	1160	FLL	26.0749	-80.1483
BAHAMAS	60	FPO	26.5477	-78.6963	1160	FLL	26.0749	-80.1483
BAHAMAS	60	FPO	26.5477	-78.6963	1178	MIA	25.7962	-80.2867
BAHAMAS	61	GHB	25.1939	-76.2389	1160	FLL	26.0749	-80.1483
BAHAMAS	62	GGT	23.5602	-75.8708	1160	FLL	26.0749	-80.1483
BAHAMAS	62	GGT	23.5602	-75.8708	1178	MIA	25.7962	-80.2867
BAHAMAS	62	GGT	23.5602	-75.8708	1146	ATL	33.6406	-84.4277
BAHAMAS	62	GGT	23.5602	-75.8708	140	YYZ	43.6802	-79.6244
BAHAMAS	62	GGT	23.5602	-75.8708	1151	CLT	35.2142	-80.4947
BAHAMAS	63	MHH	26.5126	-77.0778	1215	PBI	26.6862	-80.0932
BAHAMAS	63	MHH	26.5126	-77.0778	1160	FLL	26.0749	-80.1483
BAHAMAS	63	MHH	26.5126	-77.0778	1178	MIA	25.7962	-80.2867
BAHAMAS	64	NAS	25.043	-77.4646	1160	FLL	26.0749	-80.1483
BAHAMAS	64	NAS	25.043	-77.4646	1178	MIA	25.7962	-80.2867
BAHAMAS	64	NAS	25.043	-77.4646	1146	ATL	33.6406	-84.4277
BAHAMAS	64	NAS	25.043	-77.4646	1189	MCO	28.4312	-81.3079
BAHAMAS	64	NAS	25.043	-77.4646	1093	PLS	21.7766	-72.2702
BAHAMAS	64	NAS	25.043	-77.4646	1148	BWI	39.1776	-76.6679
BAHAMAS	64	NAS	25.043	-77.4646	1166	IAH	29.9873	-95.3389
BAHAMAS	64	NAS	25.043	-77.4646	1151	CLT	35.2142	-80.4947
BAHAMAS	64	NAS	25.043	-77.4646	1184	JFK	40.6421	-73.7778
BAHAMAS	64	NAS	25.043	-77.4646	1183	EWR	40.6899	-74.1737
BAHAMAS	64	NAS	25.043	-77.4646	1211	TPA	27.9778	-82.531
BAHAMAS	64	NAS	25.043	-77.4646	571	KIN	17.9371	-76.7796
BAHAMAS	64	NAS	25.043	-77.4646	140	YYZ	43.6802	-79.6244
BAHAMAS	64	NAS	25.043	-77.4646	452	PAP	18.5772	-72.2943
BAHAMAS	64	NAS	25.043	-77.4646	451	CAP	19.7319	-72.1944
BAHAMAS	64	NAS	25.043	-77.4646	1157	DFW	32.8996	-97.04
BAHAMAS	64	NAS	25.043	-77.4646	1135	LHR	51.4696	-0.454081
BAHAMAS	64	NAS	25.043	-77.4646	1153	ORD	41.98	-87.9093
BAHAMAS	64	NAS	25.043	-77.4646	151	GCM	19.2942	-81.3584
BAHAMAS	64	NAS	25.043	-77.4646	1191	PHL	39.8734	-75.2438
BAHAMAS	64	NAS	25.043	-77.4646	260	SNU	22.501	-79.9309
BAHAMAS	64	NAS	25.043	-77.4646	258	HOG	20.7878	-76.3055
BAHAMAS	64	NAS	25.043	-77.4646	132	YUL	45.465	-73.7443
BAHAMAS	64	NAS	25.043	-77.4646	1158	DEN	39.8583	-104.673
BAHAMAS	64	NAS	25.043	-77.4646	1185	LGA	40.7777	-73.872
BAHAMAS	64	NAS	25.043	-77.4646	1159	DTW	42.2166	-83.3557
BAHAMAS	64	NAS	25.043	-77.4646	1149	BOS	42.3659	-71.0088
BAHAMAS	64	NAS	25.043	-77.4646	795	PTY	9.06787	-79.385
BAHAMAS	64	NAS	25.043	-77.4646	257	HAV	22.9981	-82.4078
BAHAMAS	64	NAS	25.043	-77.4646	78	BZE	17.5161	-88.1946
BAHAMAS	64	NAS	25.043	-77.4646	1213	IAD	38.9532	-77.456
BAHAMAS	64	NAS	25.043	-77.4646	1214	DCA	38.852	-77.0397
BAHAMAS	64	NAS	25.043	-77.4646	123	YYC	51.1241	-114.007
BAHAMAS	65	ELH	25.3917	-76.5556	1160	FLL	26.0749	-80.1483
BAHAMAS	65	ELH	25.3917	-76.5556	1178	MIA	25.7962	-80.2867
BAHAMAS	65	ELH	25.3917	-76.5556	1146	ATL	33.6406	-84.4277
BAHAMAS	65	ELH	25.3917	-76.5556	1151	CLT	35.2142	-80.4947
BAHAMAS	66	ZSA	24.0534	-74.5285	289	PUJ	18.565	-68.3689
BAHAMAS	66	ZSA	24.0534	-74.5285	360	ORY	48.7261	2.36447
BAHAMAS	66	ZSA	24.0534	-74.5285	132	YUL	45.465	-73.7443
BAHRAIN	67	BAH	26.2691	50.6347	1110	DXB	25.2535	55.3652
BAHRAIN	67	BAH	26.2691	50.6347	625	KWI	29.2407	47.9711
BAHRAIN	67	BAH	26.2691	50.6347	779	MCT	23.6011	58.2876
BAHRAIN	67	BAH	26.2691	50.6347	923	RUH	24.9648	46.7016
BAHRAIN	67	BAH	26.2691	50.6347	920	JED	21.6626	39.1731
BAHRAIN	67	BAH	26.2691	50.6347	1108	AUH	24.4429	54.6503
BAHRAIN	67	BAH	26.2691	50.6347	916	DMM	26.4722	49.7997
BAHRAIN	67	BAH	26.2691	50.6347	486	DEL	28.5654	77.1202
BAHRAIN	67	BAH	26.2691	50.6347	1112	SHJ	25.3282	55.5123
BAHRAIN	67	BAH	26.2691	50.6347	298	CAI	30.1141	31.4011
BAHRAIN	67	BAH	26.2691	50.6347	1081	IST	41.2611	28.7441
BAHRAIN	67	BAH	26.2691	50.6347	484	BOM	19.09	72.8658
BAHRAIN	67	BAH	26.2691	50.6347	604	AMM	31.7233	35.9872
BAHRAIN	67	BAH	26.2691	50.6347	1135	LHR	51.4696	-0.454081
BAHRAIN	67	BAH	26.2691	50.6347	917	ELQ	26.3065	43.7692
BAHRAIN	67	BAH	26.2691	50.6347	1045	BKK	13.6896	100.751
BAHRAIN	67	BAH	26.2691	50.6347	480	CCJ	11.1417	75.9507
BAHRAIN	67	BAH	26.2691	50.6347	468	MAA	12.9947	80.1695
BAHRAIN	67	BAH	26.2691	50.6347	785	KHI	24.9011	67.1688
BAHRAIN	67	BAH	26.2691	50.6347	474	HYD	17.2395	78.4296
BAHRAIN	67	BAH	26.2691	50.6347	466	BLR	13.2078	77.7069
BAHRAIN	67	BAH	26.2691	50.6347	392	FRA	50.0379	8.5625
BAHRAIN	67	BAH	26.2691	50.6347	809	MNL	14.513	121.017
BAHRAIN	67	BAH	26.2691	50.6347	478	COK	10.1526	76.3968
BAHRAIN	67	BAH	26.2691	50.6347	876	DME	55.4107	37.9017
BAHRAIN	67	BAH	26.2691	50.6347	358	CDG	49.0282	2.54309
BAHRAIN	67	BAH	26.2691	50.6347	922	MED	24.5551	39.7139
BAHRAIN	67	BAH	26.2691	50.6347	489	TRV	8.48411	76.9194
BAHRAIN	67	BAH	26.2691	50.6347	787	MUX	30.1968	71.4267
BAHRAIN	67	BAH	26.2691	50.6347	790	SKT	32.5334	74.3683
BAHRAIN	67	BAH	26.2691	50.6347	786	LHE	31.5208	74.4104
BAHRAIN	67	BAH	26.2691	50.6347	414	ATH	37.9348	23.9462
BAHRAIN	67	BAH	26.2691	50.6347	54	GYD	40.4655	50.0579
BAHRAIN	67	BAH	26.2691	50.6347	69	DAC	22.2454	91.8159
BAHRAIN	67	BAH	26.2691	50.6347	526	NJF	31.9904	44.4066
BAHRAIN	67	BAH	26.2691	50.6347	788	PEW	33.9908	71.5193
BAHRAIN	67	BAH	26.2691	50.6347	632	BEY	33.8262	35.4922
BAHRAIN	67	BAH	26.2691	50.6347	1082	SAW	40.9063	29.3173
BAHRAIN	67	BAH	26.2691	50.6347	784	ISB	33.5567	72.8345
BAHRAIN	67	BAH	26.2691	50.6347	424	JMK	37.4343	25.3463
BAHRAIN	67	BAH	26.2691	50.6347	782	LYP	31.3634	72.988
BAHRAIN	67	BAH	26.2691	50.6347	527	BGW	33.2678	44.2295
BAHRAIN	67	BAH	26.2691	50.6347	780	SLL	17.0471	54.0906
BAHRAIN	67	BAH	26.2691	50.6347	721	CMN	33.3698	-7.58589
BAHRAIN	67	BAH	26.2691	50.6347	977	AGP	36.6771	-4.49366
BAHRAIN	67	BAH	26.2691	50.6347	1072	AYT	36.9036	30.8026
BAHRAIN	67	BAH	26.2691	50.6347	1090	TZX	40.995	39.7843
BAHRAIN	67	BAH	26.2691	50.6347	991	CMB	7.18037	79.8849
BAHRAIN	67	BAH	26.2691	50.6347	483	IXE	12.9542	74.8892
BAHRAIN	67	BAH	26.2691	50.6347	380	TBS	41.6697	44.9644
BAHRAIN	67	BAH	26.2691	50.6347	477	CNN	11.9152	75.551
BAHRAIN	67	BAH	26.2691	50.6347	669	MLE	4.18839	73.5285
BAHRAIN	67	BAH	26.2691	50.6347	312	ADD	8.98434	38.7963
BANGLADESH	68	CGP	22.2455	91.8125	779	MCT	23.6011	58.2876
BANGLADESH	68	CGP	22.2455	91.8125	1112	SHJ	25.3282	55.5123
BANGLADESH	68	CGP	22.2455	91.8125	834	DOH	25.2636	51.6145
BANGLADESH	68	CGP	22.2455	91.8125	479	CCU	22.6538	88.4465
BANGLADESH	68	CGP	22.2455	91.8125	1110	DXB	25.2535	55.3652
BANGLADESH	68	CGP	22.2455	91.8125	920	JED	21.6626	39.1731
BANGLADESH	68	CGP	22.2455	91.8125	1108	AUH	24.4429	54.6503
BANGLADESH	68	CGP	22.2455	91.8125	468	MAA	12.9947	80.1695
BANGLADESH	68	CGP	22.2455	91.8125	922	MED	24.5551	39.7139
BANGLADESH	68	CGP	22.2455	91.8125	625	KWI	29.2407	47.9711
BANGLADESH	69	DAC	22.2454	91.8159	479	CCU	22.6538	88.4465
BANGLADESH	69	DAC	22.2454	91.8159	657	KUL	2.73227	101.707
BANGLADESH	69	DAC	22.2454	91.8159	1112	SHJ	25.3282	55.5123
BANGLADESH	69	DAC	22.2454	91.8159	934	SIN	1.36425	103.992
BANGLADESH	69	DAC	22.2454	91.8159	744	KTM	27.699	85.3598
BANGLADESH	69	DAC	22.2454	91.8159	486	DEL	28.5654	77.1202
BANGLADESH	69	DAC	22.2454	91.8159	920	JED	21.6626	39.1731
BANGLADESH	69	DAC	22.2454	91.8159	779	MCT	23.6011	58.2876
BANGLADESH	69	DAC	22.2454	91.8159	923	RUH	24.9648	46.7016
BANGLADESH	69	DAC	22.2454	91.8159	1110	DXB	25.2535	55.3652
BANGLADESH	69	DAC	22.2454	91.8159	1045	BKK	13.6896	100.751
BANGLADESH	69	DAC	22.2454	91.8159	834	DOH	25.2636	51.6145
BANGLADESH	69	DAC	22.2454	91.8159	484	BOM	19.09	72.8658
BANGLADESH	69	DAC	22.2454	91.8159	669	MLE	4.18839	73.5285
BANGLADESH	69	DAC	22.2454	91.8159	67	BAH	26.2691	50.6347
BANGLADESH	69	DAC	22.2454	91.8159	1108	AUH	24.4429	54.6503
BANGLADESH	69	DAC	22.2454	91.8159	625	KWI	29.2407	47.9711
BANGLADESH	69	DAC	22.2454	91.8159	922	MED	24.5551	39.7139
BANGLADESH	69	DAC	22.2454	91.8159	916	DMM	26.4722	49.7997
BANGLADESH	69	DAC	22.2454	91.8159	1081	IST	41.2611	28.7441
BANGLADESH	69	DAC	22.2454	91.8159	1138	MAN	53.3589	-2.27316
BANGLADESH	69	DAC	22.2454	91.8159	1135	LHR	51.4696	-0.454081
BANGLADESH	69	DAC	22.2454	91.8159	170	CAN	23.3994	113.307
BANGLADESH	69	DAC	22.2454	91.8159	183	KMG	25.0973	102.929
BANGLADESH	69	DAC	22.2454	91.8159	991	CMB	7.18037	79.8849
BANGLADESH	69	DAC	22.2454	91.8159	81	PBH	27.4051	89.4215
BANGLADESH	69	DAC	22.2454	91.8159	1046	DMK	13.9138	100.604
BANGLADESH	69	DAC	22.2454	91.8159	457	HKG	22.3085	113.919
BANGLADESH	70	ZYL	24.9582	91.8718	1135	LHR	51.4696	-0.454081
BANGLADESH	70	ZYL	24.9582	91.8718	1108	AUH	24.4429	54.6503
BANGLADESH	70	ZYL	24.9582	91.8718	834	DOH	25.2636	51.6145
BANGLADESH	70	ZYL	24.9582	91.8718	920	JED	21.6626	39.1731
BANGLADESH	70	ZYL	24.9582	91.8718	1138	MAN	53.3589	-2.27316
BANGLADESH	70	ZYL	24.9582	91.8718	1110	DXB	25.2535	55.3652
BANGLADESH	70	ZYL	24.9582	91.8718	779	MCT	23.6011	58.2876
BARBADOS	71	BGI	13.0809	-59.4875	1000	SVD	13.1647	-61.1481
BARBADOS	71	BGI	13.0809	-59.4875	440	GND	12.008	-61.7843
BARBADOS	71	BGI	13.0809	-59.4875	997	SLU	14.021	-60.9916
BARBADOS	71	BGI	13.0809	-59.4875	1060	POS	10.5979	-61.3386
BARBADOS	71	BGI	13.0809	-59.4875	285	DOM	15.5468	-61.3007
BARBADOS	71	BGI	13.0809	-59.4875	450	OGL	6.8094	-58.1026
BARBADOS	71	BGI	13.0809	-59.4875	674	FDF	14.5954	-60.9997
BARBADOS	71	BGI	13.0809	-59.4875	995	SKB	17.3112	-62.7168
BARBADOS	71	BGI	13.0809	-59.4875	21	ANU	17.1405	-61.792
BARBADOS	71	BGI	13.0809	-59.4875	107	EIS	18.4452	-64.5392
BARBADOS	71	BGI	13.0809	-59.4875	441	PTP	16.2692	-61.5279
BARBADOS	71	BGI	13.0809	-59.4875	1184	JFK	40.6421	-73.7778
BARBADOS	71	BGI	13.0809	-59.4875	571	KIN	17.9371	-76.7796
BARBADOS	71	BGI	13.0809	-59.4875	140	YYZ	43.6802	-79.6244
BARBADOS	71	BGI	13.0809	-59.4875	1134	LGW	51.1539	-0.182535
BARBADOS	71	BGI	13.0809	-59.4875	392	FRA	50.0379	8.5625
BARBADOS	71	BGI	13.0809	-59.4875	795	PTY	9.06787	-79.385
BARBADOS	71	BGI	13.0809	-59.4875	1135	LHR	51.4696	-0.454081
BARBADOS	71	BGI	13.0809	-59.4875	1061	TAB	11.1532	-60.8391
BARBADOS	71	BGI	13.0809	-59.4875	1151	CLT	35.2142	-80.4947
BARBADOS	71	BGI	13.0809	-59.4875	1138	MAN	53.3589	-2.27316
BARBADOS	71	BGI	13.0809	-59.4875	132	YUL	45.465	-73.7443
BARBADOS	71	BGI	13.0809	-59.4875	1149	BOS	42.3659	-71.0088
BARBADOS	71	BGI	13.0809	-59.4875	1178	MIA	25.7962	-80.2867
BARBADOS	71	BGI	13.0809	-59.4875	1183	EWR	40.6899	-74.1737
BELARUS	72	MSQ	53.8889	28.0343	1101	IEV	50.4132	30.4434
BELARUS	72	MSQ	53.8889	28.0343	745	AMS	52.3104	4.76862
BELARUS	72	MSQ	53.8889	28.0343	1102	KBP	50.3386	30.8946
BELARUS	72	MSQ	53.8889	28.0343	1081	IST	41.2611	28.7441
BELARUS	72	MSQ	53.8889	28.0343	358	CDG	49.0282	2.54309
BELARUS	72	MSQ	53.8889	28.0343	1104	ODS	46.4305	30.6777
BELARUS	72	MSQ	53.8889	28.0343	53	VIE	48.1111	16.5752
BELARUS	72	MSQ	53.8889	28.0343	821	WAW	52.167	20.9683
BELARUS	72	MSQ	53.8889	28.0343	1103	LWO	49.8142	23.9613
BELARUS	72	MSQ	53.8889	28.0343	271	PRG	50.1045	14.2635
BELARUS	72	MSQ	53.8889	28.0343	392	FRA	50.0379	8.5625
BELARUS	72	MSQ	53.8889	28.0343	539	TLV	32.0132	34.8846
BELARUS	72	MSQ	53.8889	28.0343	318	HEL	60.3257	24.9501
BELARUS	72	MSQ	53.8889	28.0343	32	EVN	40.1488	44.3974
BELARUS	72	MSQ	53.8889	28.0343	631	RIX	56.9235	23.9785
BELARUS	72	MSQ	53.8889	28.0343	565	FCO	41.8013	12.2456
BELARUS	72	MSQ	53.8889	28.0343	640	VNO	54.6416	25.3055
BELARUS	72	MSQ	53.8889	28.0343	403	MUC	48.351	11.7769
BELARUS	72	MSQ	53.8889	28.0343	1134	LGW	51.1539	-0.182535
BELARUS	72	MSQ	53.8889	28.0343	714	KIV	46.935	28.9348
BELARUS	72	MSQ	53.8889	28.0343	382	SXF	52.3647	13.51
BELARUS	72	MSQ	53.8889	28.0343	1014	ARN	59.6485	17.9228
BELARUS	72	MSQ	53.8889	28.0343	555	MXP	45.6299	8.7257
BELARUS	72	MSQ	53.8889	28.0343	965	BCN	41.2972	2.08368
BELARUS	72	MSQ	53.8889	28.0343	1099	HRK	49.9221	36.282
BELARUS	72	MSQ	53.8889	28.0343	928	BEG	44.8208	20.2929
BELARUS	72	MSQ	53.8889	28.0343	458	BUD	47.4413	19.2537
BELARUS	72	MSQ	53.8889	28.0343	75	CRL	50.4622	4.45738
BELARUS	72	MSQ	53.8889	28.0343	265	LCA	34.8726	33.6217
BELARUS	72	MSQ	53.8889	28.0343	1107	OZH	47.8744	35.301
BELARUS	72	MSQ	53.8889	28.0343	310	TLL	59.4141	24.8337
BELARUS	72	MSQ	53.8889	28.0343	397	HAJ	52.4642	9.68561
BELARUS	72	MSQ	53.8889	28.0343	527	BGW	33.2678	44.2295
BELARUS	72	MSQ	53.8889	28.0343	178	HET	40.8556	111.821
BELARUS	72	MSQ	53.8889	28.0343	1091	ASB	37.9809	58.3739
BELARUS	72	MSQ	53.8889	28.0343	900	SGC	61.3402	73.4086
BELARUS	72	MSQ	53.8889	28.0343	380	TBS	41.6697	44.9644
BELARUS	72	MSQ	53.8889	28.0343	54	GYD	40.4655	50.0579
BELARUS	72	MSQ	53.8889	28.0343	378	BUS	41.6076	41.611
BELARUS	72	MSQ	53.8889	28.0343	876	DME	55.4107	37.9017
BELARUS	72	MSQ	53.8889	28.0343	1108	AUH	24.4429	54.6503
BELARUS	72	MSQ	53.8889	28.0343	877	SVO	55.9744	37.4133
BELARUS	72	MSQ	53.8889	28.0343	879	ZIA	55.5625	38.1185
BELARUS	72	MSQ	53.8889	28.0343	894	LED	59.8034	30.2677
BELARUS	72	MSQ	53.8889	28.0343	161	PEK	40.0805	116.604
BELARUS	72	MSQ	53.8889	28.0343	878	VKO	55.5997	37.272
BELARUS	72	MSQ	53.8889	28.0343	632	BEY	33.8262	35.4922
BELARUS	72	MSQ	53.8889	28.0343	1225	TAS	41.2511	69.2649
BELARUS	72	MSQ	53.8889	28.0343	1256	ROV	47.4929	39.9293
BELARUS	72	MSQ	53.8889	28.0343	1022	GVA	46.2369	6.10943
BELARUS	72	MSQ	53.8889	28.0343	870	KRR	45.0341	39.1407
BELARUS	72	MSQ	53.8889	28.0343	898	AER	43.4493	39.941
BELARUS	72	MSQ	53.8889	28.0343	863	KGD	54.8836	20.5857
BELARUS	72	MSQ	53.8889	28.0343	608	ALA	43.3505	77.0243
BELGIUM	73	ANR	51.1886	4.46219	962	ALC	38.2855	-0.559455
BELGIUM	73	ANR	51.1886	4.46219	977	AGP	36.6771	-4.49366
BELGIUM	73	ANR	51.1886	4.46219	973	IBZ	38.8749	1.37114
BELGIUM	73	ANR	51.1886	4.46219	251	SPU	43.5372	16.2989
BELGIUM	73	ANR	51.1886	4.46219	979	RMU	37.8052	-1.12961
BELGIUM	73	ANR	51.1886	4.46219	980	PMI	39.5522	2.73599
BELGIUM	73	ANR	51.1886	4.46219	1133	LCY	51.5051	0.0497326
BELGIUM	73	ANR	51.1886	4.46219	726	NDR	34.9933	-3.0263
BELGIUM	73	ANR	51.1886	4.46219	1063	NBE	36.0842	10.4396
BELGIUM	73	ANR	51.1886	4.46219	49	INN	47.2573	11.3509
BELGIUM	73	ANR	51.1886	4.46219	730	TNG	35.7255	-5.91298
BELGIUM	74	BRU	50.9006	4.48393	977	AGP	36.6771	-4.49366
BELGIUM	74	BRU	50.9006	4.48393	53	VIE	48.1111	16.5752
BELGIUM	74	BRU	50.9006	4.48393	962	ALC	38.2855	-0.559455
BELGIUM	74	BRU	50.9006	4.48393	392	FRA	50.0379	8.5625
BELGIUM	74	BRU	50.9006	4.48393	826	LIS	38.7758	-9.13511
BELGIUM	74	BRU	50.9006	4.48393	965	BCN	41.2972	2.08368
BELGIUM	74	BRU	50.9006	4.48393	281	CPH	55.6204	12.6493
BELGIUM	74	BRU	50.9006	4.48393	976	MAD	40.4989	-3.56519
BELGIUM	74	BRU	50.9006	4.48393	565	FCO	41.8013	12.2456
BELGIUM	74	BRU	50.9006	4.48393	555	MXP	45.6299	8.7257
BELGIUM	74	BRU	50.9006	4.48393	356	NCE	43.6599	7.21534
BELGIUM	74	BRU	50.9006	4.48393	403	MUC	48.351	11.7769
BELGIUM	74	BRU	50.9006	4.48393	414	ATH	37.9348	23.9462
BELGIUM	74	BRU	50.9006	4.48393	721	CMN	33.3698	-7.58589
BELGIUM	74	BRU	50.9006	4.48393	383	TXL	52.5593	13.2893
BELGIUM	74	BRU	50.9006	4.48393	828	OPO	41.2422	-8.67861
BELGIUM	74	BRU	50.9006	4.48393	841	OTP	44.5705	26.0849
BELGIUM	74	BRU	50.9006	4.48393	1022	GVA	46.2369	6.10943
BELGIUM	74	BRU	50.9006	4.48393	533	DUB	53.4264	-6.24897
BELGIUM	74	BRU	50.9006	4.48393	1081	IST	41.2611	28.7441
BELGIUM	74	BRU	50.9006	4.48393	417	HER	35.3411	25.1739
BELGIUM	74	BRU	50.9006	4.48393	824	FAO	37.0173	-7.96942
BELGIUM	74	BRU	50.9006	4.48393	1260	ZAG	45.7414	16.0672
BELGIUM	74	BRU	50.9006	4.48393	980	PMI	39.5522	2.73599
BELGIUM	74	BRU	50.9006	4.48393	1135	LHR	51.4696	-0.454081
BELGIUM	74	BRU	50.9006	4.48393	986	TFS	28.0468	-16.5723
BELGIUM	74	BRU	50.9006	4.48393	730	TNG	35.7255	-5.91298
BELGIUM	74	BRU	50.9006	4.48393	774	OSL	60.1974	11.1004
BELGIUM	74	BRU	50.9006	4.48393	726	NDR	34.9933	-3.0263
BELGIUM	74	BRU	50.9006	4.48393	1082	SAW	40.9063	29.3173
BELGIUM	74	BRU	50.9006	4.48393	745	AMS	52.3104	4.76862
BELGIUM	74	BRU	50.9006	4.48393	1014	ARN	59.6485	17.9228
BELGIUM	74	BRU	50.9006	4.48393	1025	ZRH	47.4612	8.55427
BELGIUM	74	BRU	50.9006	4.48393	671	MLA	35.8522	14.4864
BELGIUM	74	BRU	50.9006	4.48393	546	CTA	37.4688	15.0657
BELGIUM	74	BRU	50.9006	4.48393	821	WAW	52.167	20.9683
BELGIUM	74	BRU	50.9006	4.48393	458	BUD	47.4413	19.2537
BELGIUM	74	BRU	50.9006	4.48393	1069	TUN	36.8455	10.2198
BELGIUM	74	BRU	50.9006	4.48393	371	TLS	43.629	1.36884
BELGIUM	74	BRU	50.9006	4.48393	1213	IAD	38.9532	-77.456
BELGIUM	74	BRU	50.9006	4.48393	569	VCE	45.5058	12.3405
BELGIUM	74	BRU	50.9006	4.48393	318	HEL	60.3257	24.9501
BELGIUM	74	BRU	50.9006	4.48393	631	RIX	56.9235	23.9785
BELGIUM	74	BRU	50.9006	4.48393	1138	MAN	53.3589	-2.27316
BELGIUM	74	BRU	50.9006	4.48393	132	YUL	45.465	-73.7443
BELGIUM	74	BRU	50.9006	4.48393	973	IBZ	38.8749	1.37114
BELGIUM	74	BRU	50.9006	4.48393	971	LPA	27.9332	-15.3872
BELGIUM	74	BRU	50.9006	4.48393	987	VLC	39.4895	-0.477682
BELGIUM	74	BRU	50.9006	4.48393	427	RHO	36.4034	28.0911
BELGIUM	74	BRU	50.9006	4.48393	422	KGS	36.8008	27.0905
BELGIUM	74	BRU	50.9006	4.48393	1072	AYT	36.9036	30.8026
BELGIUM	74	BRU	50.9006	4.48393	382	SXF	52.3647	13.51
BELGIUM	74	BRU	50.9006	4.48393	968	BIO	43.3024	-2.9106
BELGIUM	74	BRU	50.9006	4.48393	352	MRS	43.4388	5.21356
BELGIUM	74	BRU	50.9006	4.48393	1015	BMA	59.3548	17.9423
BELGIUM	74	BRU	50.9006	4.48393	246	DBV	42.5606	18.262
BELGIUM	74	BRU	50.9006	4.48393	358	CDG	49.0282	2.54309
BELGIUM	74	BRU	50.9006	4.48393	834	DOH	25.2636	51.6145
BELGIUM	74	BRU	50.9006	4.48393	911	KGL	-1.96338	30.135
BELGIUM	74	BRU	50.9006	4.48393	5	TIA	41.4193	19.713
BELGIUM	74	BRU	50.9006	4.48393	1108	AUH	24.4429	54.6503
BELGIUM	74	BRU	50.9006	4.48393	1083	ADB	38.2942	27.154
BELGIUM	74	BRU	50.9006	4.48393	112	SOF	42.6939	23.408
BELGIUM	74	BRU	50.9006	4.48393	640	VNO	54.6416	25.3055
BELGIUM	74	BRU	50.9006	4.48393	1134	LGW	51.1539	-0.182535
BELGIUM	74	BRU	50.9006	4.48393	550	FLR	43.8075	11.202
BELGIUM	74	BRU	50.9006	4.48393	312	ADD	8.98434	38.7963
BELGIUM	74	BRU	50.9006	4.48393	558	PMO	38.1813	13.1011
BELGIUM	74	BRU	50.9006	4.48393	931	PRN	42.5754	21.0297
BELGIUM	74	BRU	50.9006	4.48393	556	NAP	40.8851	14.2891
BELGIUM	74	BRU	50.9006	4.48393	928	BEG	44.8208	20.2929
BELGIUM	74	BRU	50.9006	4.48393	271	PRG	50.1045	14.2635
BELGIUM	74	BRU	50.9006	4.48393	462	KEF	63.9816	-22.6277
BELGIUM	74	BRU	50.9006	4.48393	725	RAK	31.6021	-8.02488
BELGIUM	74	BRU	50.9006	4.48393	1110	DXB	25.2535	55.3652
BELGIUM	74	BRU	50.9006	4.48393	351	LYS	45.7235	5.08813
BELGIUM	74	BRU	50.9006	4.48393	966	GRO	41.9031	2.76345
BELGIUM	74	BRU	50.9006	4.48393	431	SKG	40.5208	22.9725
BELGIUM	74	BRU	50.9006	4.48393	840	BCM	46.5318	26.9101
BELGIUM	74	BRU	50.9006	4.48393	1071	ESB	40.1234	32.9916
BELGIUM	74	BRU	50.9006	4.48393	723	FEZ	33.9284	-4.9793
BELGIUM	74	BRU	50.9006	4.48393	413	GPA	38.1509	21.4262
BELGIUM	74	BRU	50.9006	4.48393	1077	AOE	39.8136	30.535
BELGIUM	74	BRU	50.9006	4.48393	825	FNC	32.6956	-16.7758
BELGIUM	74	BRU	50.9006	4.48393	845	IAS	47.1774	27.6175
BELGIUM	74	BRU	50.9006	4.48393	298	CAI	30.1141	31.4011
BELGIUM	74	BRU	50.9006	4.48393	1020	BSL	47.5995	7.5293
BELGIUM	74	BRU	50.9006	4.48393	562	PSA	43.6897	10.3968
BELGIUM	74	BRU	50.9006	4.48393	265	LCA	34.8726	33.6217
BELGIUM	74	BRU	50.9006	4.48393	120	DLA	4.01429	9.71516
BELGIUM	74	BRU	50.9006	4.48393	632	BEY	33.8262	35.4922
BELGIUM	74	BRU	50.9006	4.48393	985	SVQ	37.4207	-5.89219
BELGIUM	74	BRU	50.9006	4.48393	975	ACE	28.9509	-13.6027
BELGIUM	74	BRU	50.9006	4.48393	544	BDS	40.6566	17.9456
BELGIUM	74	BRU	50.9006	4.48393	299	HRG	27.181	33.8084
BELGIUM	74	BRU	50.9006	4.48393	1062	DJE	33.8706	10.7743
BELGIUM	74	BRU	50.9006	4.48393	415	CHQ	35.5411	24.1407
BELGIUM	74	BRU	50.9006	4.48393	433	ZTH	37.7557	20.887
BELGIUM	74	BRU	50.9006	4.48393	110	BOJ	42.5653	27.5131
BELGIUM	74	BRU	50.9006	4.48393	967	REU	41.1483	1.1685
BELGIUM	74	BRU	50.9006	4.48393	963	LEI	36.8452	-2.37022
BELGIUM	74	BRU	50.9006	4.48393	978	MAH	39.8636	4.22081
BELGIUM	74	BRU	50.9006	4.48393	113	VAR	43.2368	27.8278
BELGIUM	74	BRU	50.9006	4.48393	6	ALG	36.6982	3.20797
BELGIUM	74	BRU	50.9006	4.48393	718	TIV	42.4048	18.7229
BELGIUM	74	BRU	50.9006	4.48393	728	OUD	34.7872	-1.9383
BELGIUM	74	BRU	50.9006	4.48393	719	AGA	30.3296	-9.40963
BELGIUM	74	BRU	50.9006	4.48393	827	PDL	37.7486	-25.7109
BELGIUM	74	BRU	50.9006	4.48393	335	BOD	44.8295	-0.712744
BELGIUM	74	BRU	50.9006	4.48393	303	SSH	27.9837	34.3884
BELGIUM	74	BRU	50.9006	4.48393	266	PFO	34.7178	32.4831
BELGIUM	74	BRU	50.9006	4.48393	217	XIY	34.4379	108.757
BELGIUM	74	BRU	50.9006	4.48393	416	CFU	39.6086	19.9127
BELGIUM	74	BRU	50.9006	4.48393	330	AJA	41.9205	8.7945
BELGIUM	74	BRU	50.9006	4.48393	424	JMK	37.4343	25.3463
BELGIUM	74	BRU	50.9006	4.48393	1063	NBE	36.0842	10.4396
BELGIUM	74	BRU	50.9006	4.48393	1073	BJV	37.2492	27.6639
BELGIUM	74	BRU	50.9006	4.48393	1070	ADA	36.9829	35.2968
BELGIUM	74	BRU	50.9006	4.48393	604	AMM	31.7233	35.9872
BELGIUM	74	BRU	50.9006	4.48393	1074	DLM	36.7181	28.7943
BELGIUM	74	BRU	50.9006	4.48393	32	EVN	40.1488	44.3974
BELGIUM	74	BRU	50.9006	4.48393	927	DSS	14.6715	-17.0671
BELGIUM	74	BRU	50.9006	4.48393	974	XRY	36.7455	-6.06023
BELGIUM	74	BRU	50.9006	4.48393	429	JTR	36.4012	25.4778
BELGIUM	74	BRU	50.9006	4.48393	1084	ASR	38.7663	35.4822
BELGIUM	74	BRU	50.9006	4.48393	161	PEK	40.0805	116.604
BELGIUM	74	BRU	50.9006	4.48393	301	RMF	25.5556	34.5915
BELGIUM	74	BRU	50.9006	4.48393	15	ORN	35.62	-0.604253
BELGIUM	74	BRU	50.9006	4.48393	274	FIH	-4.38757	15.4471
BELGIUM	74	BRU	50.9006	4.48393	79	COO	6.3529	2.38434
BELGIUM	74	BRU	50.9006	4.48393	933	FNA	8.61781	-13.2011
BELGIUM	74	BRU	50.9006	4.48393	720	AHU	35.1795	-3.84005
BELGIUM	74	BRU	50.9006	4.48393	251	SPU	43.5372	16.2989
BELGIUM	74	BRU	50.9006	4.48393	377	BJL	13.3427	-16.6513
BELGIUM	74	BRU	50.9006	4.48393	634	ROB	6.24358	-10.3533
BELGIUM	74	BRU	50.9006	4.48393	310	TLL	59.4141	24.8337
BELGIUM	74	BRU	50.9006	4.48393	1045	BKK	13.6896	100.751
BELGIUM	74	BRU	50.9006	4.48393	620	MBA	-4.03009	39.6036
BELGIUM	74	BRU	50.9006	4.48393	380	TBS	41.6697	44.9644
BELGIUM	74	BRU	50.9006	4.48393	140	YYZ	43.6802	-79.6244
BELGIUM	74	BRU	50.9006	4.48393	877	SVO	55.9744	37.4133
BELGIUM	74	BRU	50.9006	4.48393	677	MRU	-20.4339	57.6794
BELGIUM	74	BRU	50.9006	4.48393	369	SXB	48.5389	7.62437
BELGIUM	74	BRU	50.9006	4.48393	729	RBA	34.0502	-6.74865
BELGIUM	74	BRU	50.9006	4.48393	280	BLL	55.7411	9.15686
BELGIUM	74	BRU	50.9006	4.48393	147	SID	16.7359	-22.945
BELGIUM	74	BRU	50.9006	4.48393	121	NSI	3.71484	11.5484
BELGIUM	74	BRU	50.9006	4.48393	300	LXR	25.6743	32.7015
BELGIUM	74	BRU	50.9006	4.48393	984	SCQ	42.8974	-8.41687
BELGIUM	74	BRU	50.9006	4.48393	115	OUA	12.3532	-1.51258
BELGIUM	74	BRU	50.9006	4.48393	245	ABJ	5.25489	-3.93241
BELGIUM	74	BRU	50.9006	4.48393	543	BLQ	44.5359	11.2876
BELGIUM	74	BRU	50.9006	4.48393	1102	KBP	50.3386	30.8946
BELGIUM	74	BRU	50.9006	4.48393	557	OLB	40.8998	9.51629
BELGIUM	74	BRU	50.9006	4.48393	1183	EWR	40.6899	-74.1737
BELGIUM	74	BRU	50.9006	4.48393	722	ESU	31.4036	-9.68625
BELGIUM	74	BRU	50.9006	4.48393	289	PUJ	18.565	-68.3689
BELGIUM	74	BRU	50.9006	4.48393	970	FUE	28.4486	-13.8658
BELGIUM	74	BRU	50.9006	4.48393	1146	ATL	33.6406	-84.4277
BELGIUM	74	BRU	50.9006	4.48393	814	KRK	50.0771	19.7884
BELGIUM	74	BRU	50.9006	4.48393	894	LED	59.8034	30.2677
BELGIUM	74	BRU	50.9006	4.48393	293	SDQ	18.431	-69.6765
BELGIUM	74	BRU	50.9006	4.48393	381	BER	52.365	13.5126
BELGIUM	74	BRU	50.9006	4.48393	552	SUF	38.9104	16.2468
BELGIUM	74	BRU	50.9006	4.48393	409	STR	48.6877	9.20596
BELGIUM	74	BRU	50.9006	4.48393	262	VRA	23.0341	-81.4376
BELGIUM	74	BRU	50.9006	4.48393	396	HAM	53.6336	9.99746
BELGIUM	74	BRU	50.9006	4.48393	554	LIN	45.4523	9.27687
BELGIUM	74	BRU	50.9006	4.48393	116	BJM	-3.31655	29.3219
BELGIUM	74	BRU	50.9006	4.48393	331	BIA	42.5547	9.48191
BELGIUM	74	BRU	50.9006	4.48393	1057	LFW	6.17082	1.25399
BELGIUM	74	BRU	50.9006	4.48393	354	MPL	43.5789	3.96597
BELGIUM	74	BRU	50.9006	4.48393	145	BVC	16.136	-22.8925
BELGIUM	74	BRU	50.9006	4.48393	572	MBJ	18.5026	-77.9143
BELGIUM	74	BRU	50.9006	4.48393	940	LJU	46.226	14.4566
BELGIUM	74	BRU	50.9006	4.48393	1044	ZNZ	-6.21703	39.2215
BELGIUM	74	BRU	50.9006	4.48393	682	CUN	21.0422	-86.874
BELGIUM	74	BRU	50.9006	4.48393	599	NRT	35.7726	140.393
BELGIUM	74	BRU	50.9006	4.48393	539	TLV	32.0132	34.8846
BELGIUM	74	BRU	50.9006	4.48393	322	KAO	65.9876	29.2407
BELGIUM	74	BRU	50.9006	4.48393	1117	BHX	52.4525	-1.74411
BELGIUM	74	BRU	50.9006	4.48393	1153	ORD	41.98	-87.9093
BELGIUM	74	BRU	50.9006	4.48393	1124	EDI	55.9509	-3.3609
BELGIUM	74	BRU	50.9006	4.48393	1097	EBB	0.0438059	32.441
BELGIUM	74	BRU	50.9006	4.48393	411	ACC	5.60653	-0.168123
BELGIUM	74	BRU	50.9006	4.48393	321	KTT	67.6962	24.8585
BELGIUM	74	BRU	50.9006	4.48393	288	POP	19.756	-70.5633
BELGIUM	74	BRU	50.9006	4.48393	457	HKG	22.3085	113.919
BELGIUM	74	BRU	50.9006	4.48393	1184	JFK	40.6421	-73.7778
BELGIUM	74	BRU	50.9006	4.48393	982	SPC	28.62	-17.755
BELGIUM	74	BRU	50.9006	4.48393	206	SZX	22.639	113.814
BELGIUM	74	BRU	50.9006	4.48393	1007	GOT	57.669	12.292
BELGIUM	74	BRU	50.9006	4.48393	19	LAD	-8.8487	13.2371
BELGIUM	75	CRL	50.4622	4.45738	841	OTP	44.5705	26.0849
BELGIUM	75	CRL	50.4622	4.45738	1082	SAW	40.9063	29.3173
BELGIUM	75	CRL	50.4622	4.45738	458	BUD	47.4413	19.2537
BELGIUM	75	CRL	50.4622	4.45738	112	SOF	42.6939	23.408
BELGIUM	75	CRL	50.4622	4.45738	842	CLJ	46.7828	23.6888
BELGIUM	75	CRL	50.4622	4.45738	821	WAW	52.167	20.9683
BELGIUM	75	CRL	50.4622	4.45738	962	ALC	38.2855	-0.559455
BELGIUM	75	CRL	50.4622	4.45738	562	PSA	43.6897	10.3968
BELGIUM	75	CRL	50.4622	4.45738	330	AJA	41.9205	8.7945
BELGIUM	75	CRL	50.4622	4.45738	553	BGY	45.6694	9.70392
BELGIUM	75	CRL	50.4622	4.45738	53	VIE	48.1111	16.5752
BELGIUM	75	CRL	50.4622	4.45738	331	BIA	42.5547	9.48191
BELGIUM	75	CRL	50.4622	4.45738	977	AGP	36.6771	-4.49366
BELGIUM	75	CRL	50.4622	4.45738	431	SKG	40.5208	22.9725
BELGIUM	75	CRL	50.4622	4.45738	357	FNI	43.764	4.42075
BELGIUM	75	CRL	50.4622	4.45738	965	BCN	41.2972	2.08368
BELGIUM	75	CRL	50.4622	4.45738	1138	MAN	53.3589	-2.27316
BELGIUM	75	CRL	50.4622	4.45738	352	MRS	43.4388	5.21356
BELGIUM	75	CRL	50.4622	4.45738	564	CIA	41.7994	12.5928
BELGIUM	75	CRL	50.4622	4.45738	569	VCE	45.5058	12.3405
BELGIUM	75	CRL	50.4622	4.45738	556	NAP	40.8851	14.2891
BELGIUM	75	CRL	50.4622	4.45738	814	KRK	50.0771	19.7884
BELGIUM	75	CRL	50.4622	4.45738	836	SKP	41.9636	21.6231
BELGIUM	75	CRL	50.4622	4.45738	966	GRO	41.9031	2.76345
BELGIUM	75	CRL	50.4622	4.45738	826	LIS	38.7758	-9.13511
BELGIUM	75	CRL	50.4622	4.45738	976	MAD	40.4989	-3.56519
BELGIUM	75	CRL	50.4622	4.45738	714	KIV	46.935	28.9348
BELGIUM	75	CRL	50.4622	4.45738	824	FAO	37.0173	-7.96942
BELGIUM	75	CRL	50.4622	4.45738	671	MLA	35.8522	14.4864
BELGIUM	75	CRL	50.4622	4.45738	558	PMO	38.1813	13.1011
BELGIUM	75	CRL	50.4622	4.45738	828	OPO	41.2422	-8.67861
BELGIUM	75	CRL	50.4622	4.45738	543	BLQ	44.5359	11.2876
BELGIUM	75	CRL	50.4622	4.45738	822	WMI	52.4497	20.6521
BELGIUM	75	CRL	50.4622	4.45738	985	SVQ	37.4207	-5.89219
BELGIUM	75	CRL	50.4622	4.45738	730	TNG	35.7255	-5.91298
BELGIUM	75	CRL	50.4622	4.45738	726	NDR	34.9933	-3.0263
BELGIUM	75	CRL	50.4622	4.45738	729	RBA	34.0502	-6.74865
BELGIUM	75	CRL	50.4622	4.45738	940	LJU	46.226	14.4566
BELGIUM	75	CRL	50.4622	4.45738	850	TSR	45.8101	21.3192
BELGIUM	75	CRL	50.4622	4.45738	72	MSQ	53.8889	28.0343
BELGIUM	75	CRL	50.4622	4.45738	728	OUD	34.7872	-1.9383
BELGIUM	75	CRL	50.4622	4.45738	335	BOD	44.8295	-0.712744
BELGIUM	75	CRL	50.4622	4.45738	1124	EDI	55.9509	-3.3609
BELGIUM	75	CRL	50.4622	4.45738	6	ALG	36.6982	3.20797
BELGIUM	75	CRL	50.4622	4.45738	333	BZR	43.3214	3.35193
BELGIUM	75	CRL	50.4622	4.45738	542	BRI	41.1386	16.7654
BELGIUM	75	CRL	50.4622	4.45738	990	ZAZ	41.6637	-1.00526
BELGIUM	75	CRL	50.4622	4.45738	533	DUB	53.4264	-6.24897
BELGIUM	75	CRL	50.4622	4.45738	332	EGC	44.825	0.518477
BELGIUM	75	CRL	50.4622	4.45738	674	FDF	14.5954	-60.9997
BELGIUM	75	CRL	50.4622	4.45738	979	RMU	37.8052	-1.12961
BELGIUM	75	CRL	50.4622	4.45738	540	AHO	40.6354	8.29632
BELGIUM	75	CRL	50.4622	4.45738	717	TGD	42.3778	19.2463
BELGIUM	75	CRL	50.4622	4.45738	544	BDS	40.6566	17.9456
BELGIUM	75	CRL	50.4622	4.45738	963	LEI	36.8452	-2.37022
BELGIUM	75	CRL	50.4622	4.45738	975	ACE	28.9509	-13.6027
BELGIUM	75	CRL	50.4622	4.45738	983	SDR	43.4262	-3.82191
BELGIUM	75	CRL	50.4622	4.45738	967	REU	41.1483	1.1685
BELGIUM	75	CRL	50.4622	4.45738	547	CIY	36.9981	14.6061
BELGIUM	75	CRL	50.4622	4.45738	986	TFS	28.0468	-16.5723
BELGIUM	75	CRL	50.4622	4.45738	561	PSR	42.4296	14.1855
BELGIUM	75	CRL	50.4622	4.45738	334	BIQ	43.4682	-1.52867
BELGIUM	75	CRL	50.4622	4.45738	370	TLN	43.0932	6.159
BELGIUM	75	CRL	50.4622	4.45738	631	RIX	56.9235	23.9785
BELGIUM	75	CRL	50.4622	4.45738	541	AOI	43.6171	13.362
BELGIUM	75	CRL	50.4622	4.45738	414	ATH	37.9348	23.9462
BELGIUM	75	CRL	50.4622	4.45738	980	PMI	39.5522	2.73599
BELGIUM	75	CRL	50.4622	4.45738	560	PEG	43.0949	12.5026
BELGIUM	75	CRL	50.4622	4.45738	539	TLV	32.0132	34.8846
BELGIUM	75	CRL	50.4622	4.45738	845	IAS	47.1774	27.6175
BELGIUM	75	CRL	50.4622	4.45738	973	IBZ	38.8749	1.37114
BELGIUM	75	CRL	50.4622	4.45738	545	CAG	39.2512	9.05568
BELGIUM	75	CRL	50.4622	4.45738	363	PGF	42.7414	2.86997
BELGIUM	75	CRL	50.4622	4.45738	345	FSC	41.4974	9.09894
BELGIUM	75	CRL	50.4622	4.45738	1126	GLA	55.8692	-4.43441
BELGIUM	75	CRL	50.4622	4.45738	987	VLC	39.4895	-0.477682
BELGIUM	75	CRL	50.4622	4.45738	844	CRA	44.3128	23.8784
BELGIUM	75	CRL	50.4622	4.45738	15	ORN	35.62	-0.604253
BELGIUM	75	CRL	50.4622	4.45738	379	KUT	42.1824	42.4658
BELGIUM	75	CRL	50.4622	4.45738	847	SBZ	45.7872	24.0898
BELGIUM	75	CRL	50.4622	4.45738	725	RAK	31.6021	-8.02488
BELGIUM	75	CRL	50.4622	4.45738	719	AGA	30.3296	-9.40963
BELGIUM	75	CRL	50.4622	4.45738	723	FEZ	33.9284	-4.9793
BELGIUM	75	CRL	50.4622	4.45738	721	CMN	33.3698	-7.58589
BELGIUM	75	CRL	50.4622	4.45738	970	FUE	28.4486	-13.8658
BELGIUM	75	CRL	50.4622	4.45738	427	RHO	36.4034	28.0911
BELGIUM	75	CRL	50.4622	4.45738	252	ZAD	44.0969	15.3526
BELGIUM	75	CRL	50.4622	4.45738	1069	TUN	36.8455	10.2198
BELGIUM	75	CRL	50.4622	4.45738	1063	NBE	36.0842	10.4396
BELGIUM	75	CRL	50.4622	4.45738	552	SUF	38.9104	16.2468
BELGIUM	75	CRL	50.4622	4.45738	416	CFU	39.6086	19.9127
BELGIUM	75	CRL	50.4622	4.45738	415	CHQ	35.5411	24.1407
BELGIUM	75	CRL	50.4622	4.45738	971	LPA	27.9332	-15.3872
BELGIUM	75	CRL	50.4622	4.45738	249	PUY	44.8996	13.9248
BELGIUM	75	CRL	50.4622	4.45738	338	CLY	42.5253	8.78965
BELGIUM	75	CRL	50.4622	4.45738	12	CZL	36.2834	6.62249
BELGIUM	75	CRL	50.4622	4.45738	5	TIA	41.4193	19.713
BELGIUM	75	CRL	50.4622	4.45738	85	BNX	44.9334	17.304
BELGIUM	75	CRL	50.4622	4.45738	823	WRO	51.11	16.8819
BELGIUM	75	CRL	50.4622	4.45738	441	PTP	16.2692	-61.5279
BELGIUM	75	CRL	50.4622	4.45738	271	PRG	50.1045	14.2635
BELGIUM	75	CRL	50.4622	4.45738	371	TLS	43.629	1.36884
BELGIUM	75	CRL	50.4622	4.45738	417	HER	35.3411	25.1739
BELGIUM	75	CRL	50.4622	4.45738	567	TRN	45.1965	7.64739
BELGIUM	75	CRL	50.4622	4.45738	367	RDZ	44.4109	2.48369
BELGIUM	75	CRL	50.4622	4.45738	568	TSF	45.6539	12.2015
BELGIUM	75	CRL	50.4622	4.45738	281	CPH	55.6204	12.6493
BELGIUM	75	CRL	50.4622	4.45738	640	VNO	54.6416	25.3055
BELGIUM	75	CRL	50.4622	4.45738	339	CCF	42.5253	8.78965
BELGIUM	75	CRL	50.4622	4.45738	303	SSH	27.9837	34.3884
BELGIUM	75	CRL	50.4622	4.45738	347	LRH	46.1757	-1.19363
BELGIUM	75	CRL	50.4622	4.45738	1062	DJE	33.8706	10.7743
BELGIUM	75	CRL	50.4622	4.45738	720	AHU	35.1795	-3.84005
BELGIUM	75	CRL	50.4622	4.45738	937	BTS	48.1703	17.2107
BELGIUM	75	CRL	50.4622	4.45738	299	HRG	27.181	33.8084
BELGIUM	76	LGG	50.6414	5.44692	962	ALC	38.2855	-0.559455
BELGIUM	76	LGG	50.6414	5.44692	1084	ASR	38.7663	35.4822
BELGIUM	76	LGG	50.6414	5.44692	539	TLV	32.0132	34.8846
BELGIUM	76	LGG	50.6414	5.44692	986	TFS	28.0468	-16.5723
BELGIUM	76	LGG	50.6414	5.44692	417	HER	35.3411	25.1739
BELGIUM	76	LGG	50.6414	5.44692	980	PMI	39.5522	2.73599
BELGIUM	76	LGG	50.6414	5.44692	731	TTU	35.5915	-5.3281
BELGIUM	76	LGG	50.6414	5.44692	728	OUD	34.7872	-1.9383
BELGIUM	76	LGG	50.6414	5.44692	730	TNG	35.7255	-5.91298
BELGIUM	76	LGG	50.6414	5.44692	971	LPA	27.9332	-15.3872
BELGIUM	76	LGG	50.6414	5.44692	427	RHO	36.4034	28.0911
BELGIUM	76	LGG	50.6414	5.44692	977	AGP	36.6771	-4.49366
BELGIUM	77	OST	51.2044	2.87062	962	ALC	38.2855	-0.559455
BELGIUM	77	OST	51.2044	2.87062	986	TFS	28.0468	-16.5723
BELGIUM	77	OST	51.2044	2.87062	980	PMI	39.5522	2.73599
BELGIUM	77	OST	51.2044	2.87062	977	AGP	36.6771	-4.49366
BELGIUM	77	OST	51.2044	2.87062	1077	AOE	39.8136	30.535
BELGIUM	77	OST	51.2044	2.87062	417	HER	35.3411	25.1739
BELGIUM	77	OST	51.2044	2.87062	973	IBZ	38.8749	1.37114
BELGIUM	77	OST	51.2044	2.87062	416	CFU	39.6086	19.9127
BELGIUM	77	OST	51.2044	2.87062	971	LPA	27.9332	-15.3872
BELGIUM	77	OST	51.2044	2.87062	1063	NBE	36.0842	10.4396
BELGIUM	77	OST	51.2044	2.87062	1073	BJV	37.2492	27.6639
BELGIUM	77	OST	51.2044	2.87062	979	RMU	37.8052	-1.12961
BELGIUM	77	OST	51.2044	2.87062	422	KGS	36.8008	27.0905
BELGIUM	77	OST	51.2044	2.87062	427	RHO	36.4034	28.0911
BELGIUM	77	OST	51.2044	2.87062	1072	AYT	36.9036	30.8026
BELGIUM	77	OST	51.2044	2.87062	415	CHQ	35.5411	24.1407
BELGIUM	77	OST	51.2044	2.87062	1062	DJE	33.8706	10.7743
BELGIUM	77	OST	51.2044	2.87062	299	HRG	27.181	33.8084
BELGIUM	77	OST	51.2044	2.87062	1083	ADB	38.2942	27.154
BELGIUM	77	OST	51.2044	2.87062	303	SSH	27.9837	34.3884
BELIZE	78	BZE	17.5161	-88.1946	454	RTB	16.3496	-86.5229
BELIZE	78	BZE	17.5161	-88.1946	682	CUN	21.0422	-86.874
BELIZE	78	BZE	17.5161	-88.1946	443	FRS	16.9157	-89.8779
BELIZE	78	BZE	17.5161	-88.1946	444	GUA	14.5896	-90.5301
BELIZE	78	BZE	17.5161	-88.1946	1166	IAH	29.9873	-95.3389
BELIZE	78	BZE	17.5161	-88.1946	64	NAS	25.043	-77.4646
BELIZE	78	BZE	17.5161	-88.1946	1146	ATL	33.6406	-84.4277
BELIZE	78	BZE	17.5161	-88.1946	1151	CLT	35.2142	-80.4947
BELIZE	78	BZE	17.5161	-88.1946	123	YYC	51.1241	-114.007
BELIZE	78	BZE	17.5161	-88.1946	1180	MSP	44.8852	-93.2214
BELIZE	78	BZE	17.5161	-88.1946	1153	ORD	41.98	-87.9093
BELIZE	78	BZE	17.5161	-88.1946	795	PTY	9.06787	-79.385
BELIZE	78	BZE	17.5161	-88.1946	305	SAL	16.7351	-22.944
BELIZE	78	BZE	17.5161	-88.1946	1157	DFW	32.8996	-97.04
BELIZE	78	BZE	17.5161	-88.1946	140	YYZ	43.6802	-79.6244
BELIZE	78	BZE	17.5161	-88.1946	1183	EWR	40.6899	-74.1737
BELIZE	78	BZE	17.5161	-88.1946	1178	MIA	25.7962	-80.2867
BELIZE	78	BZE	17.5161	-88.1946	1175	LAX	33.942	-118.409
BENIN	79	COO	6.3529	2.38434	375	LBV	0.458614	9.40987
BENIN	79	COO	6.3529	2.38434	245	ABJ	5.25489	-3.93241
BENIN	79	COO	6.3529	2.38434	115	OUA	12.3532	-1.51258
BENIN	79	COO	6.3529	2.38434	358	CDG	49.0282	2.54309
BENIN	79	COO	6.3529	2.38434	670	BKO	12.5422	-7.94257
BENIN	79	COO	6.3529	2.38434	1057	LFW	6.17082	1.25399
BENIN	79	COO	6.3529	2.38434	307	SSG	3.75678	8.71083
BENIN	79	COO	6.3529	2.38434	120	DLA	4.01429	9.71516
BENIN	79	COO	6.3529	2.38434	312	ADD	8.98434	38.7963
BENIN	79	COO	6.3529	2.38434	927	DSS	14.6715	-17.0671
BENIN	79	COO	6.3529	2.38434	1259	PNR	-4.81149	11.8869
BENIN	79	COO	6.3529	2.38434	1069	TUN	36.8455	10.2198
BENIN	79	COO	6.3529	2.38434	74	BRU	50.9006	4.48393
BENIN	79	COO	6.3529	2.38434	759	NIM	13.4825	2.18261
BENIN	79	COO	6.3529	2.38434	1081	IST	41.2611	28.7441
BENIN	79	COO	6.3529	2.38434	837	BZV	-4.25873	15.2515
BENIN	79	COO	6.3529	2.38434	763	LOS	6.58109	3.32082
BENIN	79	COO	6.3529	2.38434	721	CMN	33.3698	-7.58589
BERMUDA	80	BDA	32.36	-64.7007	1146	ATL	33.6406	-84.4277
BERMUDA	80	BDA	32.36	-64.7007	140	YYZ	43.6802	-79.6244
BERMUDA	80	BDA	32.36	-64.7007	1134	LGW	51.1539	-0.182535
BERMUDA	80	BDA	32.36	-64.7007	1151	CLT	35.2142	-80.4947
BERMUDA	80	BDA	32.36	-64.7007	1183	EWR	40.6899	-74.1737
BERMUDA	80	BDA	32.36	-64.7007	1178	MIA	25.7962	-80.2867
BERMUDA	80	BDA	32.36	-64.7007	1149	BOS	42.3659	-71.0088
BERMUDA	80	BDA	32.36	-64.7007	1214	DCA	38.852	-77.0397
BERMUDA	80	BDA	32.36	-64.7007	1184	JFK	40.6421	-73.7778
BERMUDA	80	BDA	32.36	-64.7007	1191	PHL	39.8734	-75.2438
BHUTAN	81	PBH	27.4051	89.4215	479	CCU	22.6538	88.4465
BHUTAN	81	PBH	27.4051	89.4215	486	DEL	28.5654	77.1202
BHUTAN	81	PBH	27.4051	89.4215	744	KTM	27.699	85.3598
BHUTAN	81	PBH	27.4051	89.4215	1045	BKK	13.6896	100.751
BHUTAN	81	PBH	27.4051	89.4215	625	KWI	29.2407	47.9711
BHUTAN	81	PBH	27.4051	89.4215	471	GAY	24.7495	84.9439
BHUTAN	81	PBH	27.4051	89.4215	69	DAC	22.2454	91.8159
BHUTAN	81	PBH	27.4051	89.4215	473	GAU	26.1086	91.5858
BHUTAN	81	PBH	27.4051	89.4215	465	IXB	26.6829	88.3251
BOLIVIA	82	CBB	-17.4164	-66.1757	801	IQT	-3.78429	-73.3001
BOLIVIA	82	CBB	-17.4164	-66.1757	1255	GRU	-23.4298	-46.4711
BOLIVIA	82	CBB	-17.4164	-66.1757	976	MAD	40.4989	-3.56519
BOLIVIA	83	LPB	-16.5114	-68.184	157	IQQ	-20.5337	-70.1803
BOLIVIA	83	LPB	-16.5114	-68.184	800	CUZ	-13.5386	-71.9428
BOLIVIA	83	LPB	-16.5114	-68.184	232	BOG	4.70012	-74.1482
BOLIVIA	83	LPB	-16.5114	-68.184	802	LIM	-12.0235	-77.1124
BOLIVIA	83	LPB	-16.5114	-68.184	159	SCL	-53.0015	-70.8466
BOLIVIA	84	VVI	-17.6442	-63.1383	797	ASU	-25.2411	-57.5142
BOLIVIA	84	VVI	-17.6442	-63.1383	1178	MIA	25.7962	-80.2867
BOLIVIA	84	VVI	-17.6442	-63.1383	800	CUZ	-13.5386	-71.9428
BOLIVIA	84	VVI	-17.6442	-63.1383	105	GIG	-22.8069	-43.259
BOLIVIA	84	VVI	-17.6442	-63.1383	97	IGU	-25.5961	-54.4924
BOLIVIA	84	VVI	-17.6442	-63.1383	1255	GRU	-23.4298	-46.4711
BOLIVIA	84	VVI	-17.6442	-63.1383	976	MAD	40.4989	-3.56519
BOLIVIA	84	VVI	-17.6442	-63.1383	28	SLA	-24.8444	-65.4774
BOLIVIA	84	VVI	-17.6442	-63.1383	1231	CCS	10.6022	-66.9965
BOLIVIA	84	VVI	-17.6442	-63.1383	795	PTY	9.06787	-79.385
BOLIVIA	84	VVI	-17.6442	-63.1383	159	SCL	-53.0015	-70.8466
BOLIVIA	84	VVI	-17.6442	-63.1383	232	BOG	4.70012	-74.1482
BOLIVIA	84	VVI	-17.6442	-63.1383	22	EZE	-34.815	-58.5364
BOLIVIA	84	VVI	-17.6442	-63.1383	802	LIM	-12.0235	-77.1124
BOSNIA & HERZEGOVINA	85	BNX	44.9334	17.304	928	BEG	44.8208	20.2929
BOSNIA & HERZEGOVINA	85	BNX	44.9334	17.304	393	HHN	49.9432	7.2631
BOSNIA & HERZEGOVINA	85	BNX	44.9334	17.304	53	VIE	48.1111	16.5752
BOSNIA & HERZEGOVINA	85	BNX	44.9334	17.304	75	CRL	50.4622	4.45738
BOSNIA & HERZEGOVINA	85	BNX	44.9334	17.304	553	BGY	45.6694	9.70392
BOSNIA & HERZEGOVINA	85	BNX	44.9334	17.304	401	FMM	47.9869	10.2343
BOSNIA & HERZEGOVINA	86	OMO	43.2897	17.8364	1260	ZAG	45.7414	16.0672
BOSNIA & HERZEGOVINA	87	SJJ	43.8256	18.3384	1112	SHJ	25.3282	55.5123
BOSNIA & HERZEGOVINA	87	SJJ	43.8256	18.3384	53	VIE	48.1111	16.5752
BOSNIA & HERZEGOVINA	87	SJJ	43.8256	18.3384	1260	ZAG	45.7414	16.0672
BOSNIA & HERZEGOVINA	87	SJJ	43.8256	18.3384	1082	SAW	40.9063	29.3173
BOSNIA & HERZEGOVINA	87	SJJ	43.8256	18.3384	928	BEG	44.8208	20.2929
BOSNIA & HERZEGOVINA	87	SJJ	43.8256	18.3384	1081	IST	41.2611	28.7441
BOSNIA & HERZEGOVINA	87	SJJ	43.8256	18.3384	1110	DXB	25.2535	55.3652
BOSNIA & HERZEGOVINA	87	SJJ	43.8256	18.3384	458	BUD	47.4413	19.2537
BOSNIA & HERZEGOVINA	87	SJJ	43.8256	18.3384	386	CGN	50.8668	7.14189
BOSNIA & HERZEGOVINA	87	SJJ	43.8256	18.3384	409	STR	48.6877	9.20596
BOSNIA & HERZEGOVINA	87	SJJ	43.8256	18.3384	625	KWI	29.2407	47.9711
BOSNIA & HERZEGOVINA	87	SJJ	43.8256	18.3384	403	MUC	48.351	11.7769
BOSNIA & HERZEGOVINA	87	SJJ	43.8256	18.3384	1014	ARN	59.6485	17.9228
BOSNIA & HERZEGOVINA	87	SJJ	43.8256	18.3384	834	DOH	25.2636	51.6145
BOSNIA & HERZEGOVINA	87	SJJ	43.8256	18.3384	920	JED	21.6626	39.1731
BOSNIA & HERZEGOVINA	87	SJJ	43.8256	18.3384	923	RUH	24.9648	46.7016
BOSNIA & HERZEGOVINA	87	SJJ	43.8256	18.3384	774	OSL	60.1974	11.1004
BOSNIA & HERZEGOVINA	88	TZL	44.4637	18.7085	387	DTM	51.517	7.61156
BOSNIA & HERZEGOVINA	88	TZL	44.4637	18.7085	1020	BSL	47.5995	7.5293
BOSNIA & HERZEGOVINA	88	TZL	44.4637	18.7085	1007	GOT	57.669	12.292
BOSNIA & HERZEGOVINA	88	TZL	44.4637	18.7085	1010	MMX	55.5354	13.372
BOSNIA & HERZEGOVINA	88	TZL	44.4637	18.7085	746	EIN	51.4572	5.39444
BOSNIA & HERZEGOVINA	88	TZL	44.4637	18.7085	393	HHN	49.9432	7.2631
BOSNIA & HERZEGOVINA	88	TZL	44.4637	18.7085	53	VIE	48.1111	16.5752
BOSNIA & HERZEGOVINA	88	TZL	44.4637	18.7085	280	BLL	55.7411	9.15686
BOSNIA & HERZEGOVINA	88	TZL	44.4637	18.7085	401	FMM	47.9869	10.2343
BOSNIA & HERZEGOVINA	88	TZL	44.4637	18.7085	1016	NYO	58.7887	16.9154
BOSNIA & HERZEGOVINA	88	TZL	44.4637	18.7085	386	CGN	50.8668	7.14189
BOSNIA & HERZEGOVINA	88	TZL	44.4637	18.7085	394	FDH	47.6717	9.51169
BOSNIA & HERZEGOVINA	88	TZL	44.4637	18.7085	1018	VXO	56.9252	14.7339
BOSNIA & HERZEGOVINA	88	TZL	44.4637	18.7085	399	FKB	48.7789	8.08987
BOSNIA & HERZEGOVINA	88	TZL	44.4637	18.7085	382	SXF	52.3647	13.51
BOSNIA & HERZEGOVINA	88	TZL	44.4637	18.7085	52	SZG	47.7948	13.0029
BOTSWANA	89	GBE	-24.557	25.922	312	ADD	8.98434	38.7963
BOTSWANA	89	GBE	-24.557	25.922	949	DUR	-29.6104	31.117
BOTSWANA	89	GBE	-24.557	25.922	950	JNB	-26.1362	28.2423
BOTSWANA	89	GBE	-24.557	25.922	1252	VFA	-18.0956	25.8513
BOTSWANA	89	GBE	-24.557	25.922	948	CPT	-33.9712	18.6028
BOTSWANA	89	GBE	-24.557	25.922	742	WDH	-22.4873	17.4636
BOTSWANA	90	BBK	-17.8248	25.1713	950	JNB	-26.1362	28.2423
BOTSWANA	91	MUB	-19.9755	23.429	948	CPT	-33.9712	18.6028
BOTSWANA	91	MUB	-19.9755	23.429	950	JNB	-26.1362	28.2423
BRAZIL	92	BEL	-1.38239	-48.4791	1004	PBM	5.45694	-55.198
BRAZIL	92	BEL	-1.38239	-48.4791	826	LIS	38.7758	-9.13511
BRAZIL	92	BEL	-1.38239	-48.4791	1178	MIA	25.7962	-80.2867
BRAZIL	92	BEL	-1.38239	-48.4791	1160	FLL	26.0749	-80.1483
BRAZIL	93	CNF	-19.6329	-43.9673	826	LIS	38.7758	-9.13511
BRAZIL	93	CNF	-19.6329	-43.9673	1189	MCO	28.4312	-81.3079
BRAZIL	93	CNF	-19.6329	-43.9673	1160	FLL	26.0749	-80.1483
BRAZIL	93	CNF	-19.6329	-43.9673	795	PTY	9.06787	-79.385
BRAZIL	93	CNF	-19.6329	-43.9673	22	EZE	-34.815	-58.5364
BRAZIL	94	CWB	-25.5318	-49.1729	23	EZE	-34.815	-58.5364
BRAZIL	95	FNL	-27.6702	-48.5445	24	EZE	-34.815	-58.5364
BRAZIL	95	FNL	-27.6702	-48.5445	159	SCL	-53.0015	-70.8466
BRAZIL	95	FNL	-27.6702	-48.5445	23	COR	-31.3156	-64.2156
BRAZIL	96	FOR	-3.77798	-38.5316	826	LIS	38.7758	-9.13511
BRAZIL	96	FOR	-3.77798	-38.5316	745	AMS	52.3104	4.76862
BRAZIL	96	FOR	-3.77798	-38.5316	976	MAD	40.4989	-3.56519
BRAZIL	96	FOR	-3.77798	-38.5316	22	EZE	-34.815	-58.5364
BRAZIL	96	FOR	-3.77798	-38.5316	1189	MCO	28.4312	-81.3079
BRAZIL	96	FOR	-3.77798	-38.5316	147	SID	16.7359	-22.945
BRAZIL	96	FOR	-3.77798	-38.5316	358	CDG	49.0282	2.54309
BRAZIL	96	FOR	-3.77798	-38.5316	1178	MIA	25.7962	-80.2867
BRAZIL	97	IGU	-25.5961	-54.4924	84	VVI	-17.6442	-63.1383
BRAZIL	97	IGU	-25.5961	-54.4924	802	LIM	-12.0235	-77.1124
BRAZIL	97	IGU	-25.5961	-54.4924	159	SCL	-53.0015	-70.8466
BRAZIL	98	JPA	-7.14585	-34.9498	22	EZE	-34.815	-58.5364
BRAZIL	99	MCZ	-9.51372	-35.7912	23	EZE	-34.815	-58.5364
BRAZIL	99	MCZ	-9.51372	-35.7912	826	LIS	38.7758	-9.13511
BRAZIL	100	MAO	-3.03405	-60.0449	1231	CCS	10.6022	-66.9965
BRAZIL	100	MAO	-3.03405	-60.0449	1189	MCO	28.4312	-81.3079
BRAZIL	100	MAO	-3.03405	-60.0449	795	PTY	9.06787	-79.385
BRAZIL	100	MAO	-3.03405	-60.0449	1178	MIA	25.7962	-80.2867
BRAZIL	101	NAT	-5.77231	-35.3592	22	EZE	-34.815	-58.5364
BRAZIL	101	NAT	-5.77231	-35.3592	826	LIS	38.7758	-9.13511
BRAZIL	102	POA	-29.9928	-51.1724	802	LIM	-12.0235	-77.1124
BRAZIL	102	POA	-29.9928	-51.1724	159	SCL	-53.0015	-70.8466
BRAZIL	102	POA	-29.9928	-51.1724	826	LIS	38.7758	-9.13511
BRAZIL	102	POA	-29.9928	-51.1724	22	EZE	-34.815	-58.5364
BRAZIL	102	POA	-29.9928	-51.1724	1216	MVD	-34.8372	-56.0153
BRAZIL	102	POA	-29.9928	-51.1724	795	PTY	9.06787	-79.385
BRAZIL	102	POA	-29.9928	-51.1724	232	BOG	4.70012	-74.1482
BRAZIL	103	BPS	-16.4404	-39.0793	23	COR	-31.3156	-64.2156
BRAZIL	103	BPS	-16.4404	-39.0793	22	EZE	-34.815	-58.5364
BRAZIL	104	REC	-8.12546	-34.9265	826	LIS	38.7758	-9.13511
BRAZIL	104	REC	-8.12546	-34.9265	1189	MCO	28.4312	-81.3079
BRAZIL	104	REC	-8.12546	-34.9265	1178	MIA	25.7962	-80.2867
BRAZIL	104	REC	-8.12546	-34.9265	795	PTY	9.06787	-79.385
BRAZIL	104	REC	-8.12546	-34.9265	159	SCL	-53.0015	-70.8466
BRAZIL	104	REC	-8.12546	-34.9265	976	MAD	40.4989	-3.56519
BRAZIL	104	REC	-8.12546	-34.9265	147	SID	16.7359	-22.945
BRAZIL	104	REC	-8.12546	-34.9265	1216	MVD	-34.8372	-56.0153
BRAZIL	104	REC	-8.12546	-34.9265	22	EZE	-34.815	-58.5364
BRAZIL	104	REC	-8.12546	-34.9265	1160	FLL	26.0749	-80.1483
BRAZIL	105	GIG	-22.8069	-43.259	745	AMS	52.3104	4.76862
BRAZIL	105	GIG	-22.8069	-43.259	84	VVI	-17.6442	-63.1383
BRAZIL	105	GIG	-22.8069	-43.259	358	CDG	49.0282	2.54309
BRAZIL	105	GIG	-22.8069	-43.259	826	LIS	38.7758	-9.13511
BRAZIL	105	GIG	-22.8069	-43.259	1146	ATL	33.6406	-84.4277
BRAZIL	105	GIG	-22.8069	-43.259	24	EPA	-34.6066	-58.6019
BRAZIL	105	GIG	-22.8069	-43.259	1216	MVD	-34.8372	-56.0153
BRAZIL	105	GIG	-22.8069	-43.259	392	FRA	50.0379	8.5625
BRAZIL	105	GIG	-22.8069	-43.259	795	PTY	9.06787	-79.385
BRAZIL	105	GIG	-22.8069	-43.259	22	EZE	-34.815	-58.5364
BRAZIL	105	GIG	-22.8069	-43.259	1135	LHR	51.4696	-0.454081
BRAZIL	105	GIG	-22.8069	-43.259	27	ROS	-32.9174	-60.7828
BRAZIL	105	GIG	-22.8069	-43.259	1166	IAH	29.9873	-95.3389
BRAZIL	105	GIG	-22.8069	-43.259	565	FCO	41.8013	12.2456
BRAZIL	105	GIG	-22.8069	-43.259	1184	JFK	40.6421	-73.7778
BRAZIL	105	GIG	-22.8069	-43.259	802	LIM	-12.0235	-77.1124
BRAZIL	105	GIG	-22.8069	-43.259	232	BOG	4.70012	-74.1482
BRAZIL	105	GIG	-22.8069	-43.259	1178	MIA	25.7962	-80.2867
BRAZIL	105	GIG	-22.8069	-43.259	23	COR	-31.3156	-64.2156
BRAZIL	105	GIG	-22.8069	-43.259	721	CMN	33.3698	-7.58589
BRAZIL	105	GIG	-22.8069	-43.259	1110	DXB	25.2535	55.3652
BRAZIL	105	GIG	-22.8069	-43.259	976	MAD	40.4989	-3.56519
BRAZIL	105	GIG	-22.8069	-43.259	159	SCL	-53.0015	-70.8466
BRAZIL	105	GIG	-22.8069	-43.259	828	OPO	41.2422	-8.67861
BRAZIL	105	GIG	-22.8069	-43.259	1025	ZRH	47.4612	8.55427
BRAZIL	106	SSA	-12.9115	-38.3294	826	LIS	38.7758	-9.13511
BRAZIL	106	SSA	-12.9115	-38.3294	795	PTY	9.06787	-79.385
BRAZIL	106	SSA	-12.9115	-38.3294	159	SCL	-53.0015	-70.8466
BRAZIL	106	SSA	-12.9115	-38.3294	22	EZE	-34.815	-58.5364
BRAZIL	106	SSA	-12.9115	-38.3294	1178	MIA	25.7962	-80.2867
BRAZIL	106	SSA	-12.9115	-38.3294	976	MAD	40.4989	-3.56519
BRAZIL	106	SSA	-12.9115	-38.3294	23	COR	-31.3156	-64.2156
BRITISH VIRGIN ISLANDS	107	EIS	18.4452	-64.5392	833	SJU	18.4431	-66.0035
BRITISH VIRGIN ISLANDS	107	EIS	18.4452	-64.5392	936	SXM	18.0412	-63.1129
BRITISH VIRGIN ISLANDS	107	EIS	18.4452	-64.5392	1096	STT	18.3391	-64.9725
BRITISH VIRGIN ISLANDS	107	EIS	18.4452	-64.5392	21	ANU	17.1405	-61.792
BRITISH VIRGIN ISLANDS	107	EIS	18.4452	-64.5392	285	DOM	15.5468	-61.3007
BRITISH VIRGIN ISLANDS	107	EIS	18.4452	-64.5392	293	SDQ	18.431	-69.6765
BRITISH VIRGIN ISLANDS	107	EIS	18.4452	-64.5392	71	BGI	13.0809	-59.4875
BRITISH VIRGIN ISLANDS	107	EIS	18.4452	-64.5392	994	NEV	17.2065	-62.5898
BRITISH VIRGIN ISLANDS	107	EIS	18.4452	-64.5392	289	PUJ	18.565	-68.3689
BRITISH VIRGIN ISLANDS	108	VIJ	18.4464	-64.4275	833	SJU	18.4431	-66.0035
BRITISH VIRGIN ISLANDS	108	VIJ	18.4464	-64.4275	1096	STT	18.3391	-64.9725
BRITISH VIRGIN ISLANDS	108	VIJ	18.4464	-64.4275	936	SXM	18.0412	-63.1129
BRITISH VIRGIN ISLANDS	108	VIJ	18.4464	-64.4275	994	NEV	17.2065	-62.5898
BRUNEI	109	BWN	4.94392	114.932	657	KUL	2.73227	101.707
BRUNEI	109	BWN	4.94392	114.932	934	SIN	1.36425	103.992
BRUNEI	109	BWN	4.94392	114.932	457	HKG	22.3085	113.919
BRUNEI	109	BWN	4.94392	114.932	41	MEL	-37.6705	144.841
BRUNEI	109	BWN	4.94392	114.932	809	MNL	14.513	121.017
BRUNEI	109	BWN	4.94392	114.932	1135	LHR	51.4696	-0.454081
BRUNEI	109	BWN	4.94392	114.932	599	NRT	35.7726	140.393
BRUNEI	109	BWN	4.94392	114.932	1045	BKK	13.6896	100.751
BRUNEI	109	BWN	4.94392	114.932	666	SBW	2.25644	111.987
BRUNEI	109	BWN	4.94392	114.932	497	CGK	-6.12727	106.654
BRUNEI	109	BWN	4.94392	114.932	1239	SGN	10.8191	106.659
BRUNEI	109	BWN	4.94392	114.932	496	DPS	-8.74506	115.166
BRUNEI	109	BWN	4.94392	114.932	1032	TPE	25.0803	121.235
BRUNEI	109	BWN	4.94392	114.932	173	HAK	19.9392	110.462
BRUNEI	109	BWN	4.94392	114.932	659	KCH	1.48587	110.341
BRUNEI	109	BWN	4.94392	114.932	196	NNG	22.6106	108.171
BRUNEI	109	BWN	4.94392	114.932	655	BKI	5.92364	116.051
BRUNEI	109	BWN	4.94392	114.932	203	PVG	31.1456	121.808
BRUNEI	109	BWN	4.94392	114.932	35	BNE	-27.3926	153.122
BRUNEI	109	BWN	4.94392	114.932	665	SDK	5.89779	118.062
BRUNEI	109	BWN	4.94392	114.932	164	CSX	28.1976	113.221
BRUNEI	109	BWN	4.94392	114.932	509	SUB	-7.37888	112.788
BRUNEI	109	BWN	4.94392	114.932	1110	DXB	25.2535	55.3652
BRUNEI	109	BWN	4.94392	114.932	667	TWU	4.31462	118.116
BRUNEI	109	BWN	4.94392	114.932	175	HGH	30.2374	120.439
BRUNEI	109	BWN	4.94392	114.932	162	PKX	39.5105	116.41
BRUNEI	109	BWN	4.94392	114.932	958	ICN	37.4469	126.451
BULGARIA	110	BOJ	42.5653	27.5131	878	VKO	55.5997	37.272
BULGARIA	110	BOJ	42.5653	27.5131	271	PRG	50.1045	14.2635
BULGARIA	110	BOJ	42.5653	27.5131	821	WAW	52.167	20.9683
BULGARIA	110	BOJ	42.5653	27.5131	813	KTW	50.4728	19.0777
BULGARIA	110	BOJ	42.5653	27.5131	1102	KBP	50.3386	30.8946
BULGARIA	110	BOJ	42.5653	27.5131	1136	LTN	51.8764	-0.371575
BULGARIA	110	BOJ	42.5653	27.5131	877	SVO	55.9744	37.4133
BULGARIA	110	BOJ	42.5653	27.5131	539	TLV	32.0132	34.8846
BULGARIA	110	BOJ	42.5653	27.5131	1138	MAN	53.3589	-2.27316
BULGARIA	110	BOJ	42.5653	27.5131	1098	DNK	48.3691	35.0937
BULGARIA	110	BOJ	42.5653	27.5131	267	BRQ	49.1534	16.6936
BULGARIA	110	BOJ	42.5653	27.5131	533	DUB	53.4264	-6.24897
BULGARIA	110	BOJ	42.5653	27.5131	389	DUS	51.2875	6.76743
BULGARIA	110	BOJ	42.5653	27.5131	458	BUD	47.4413	19.2537
BULGARIA	110	BOJ	42.5653	27.5131	1137	STN	51.8862	0.238265
BULGARIA	110	BOJ	42.5653	27.5131	894	LED	59.8034	30.2677
BULGARIA	110	BOJ	42.5653	27.5131	53	VIE	48.1111	16.5752
BULGARIA	110	BOJ	42.5653	27.5131	745	AMS	52.3104	4.76862
BULGARIA	110	BOJ	42.5653	27.5131	937	BTS	48.1703	17.2107
BULGARIA	110	BOJ	42.5653	27.5131	823	WRO	51.11	16.8819
BULGARIA	110	BOJ	42.5653	27.5131	269	OSR	49.6968	18.1155
BULGARIA	110	BOJ	42.5653	27.5131	409	STR	48.6877	9.20596
BULGARIA	110	BOJ	42.5653	27.5131	812	GDN	54.3792	18.4679
BULGARIA	110	BOJ	42.5653	27.5131	817	POZ	52.4199	16.8296
BULGARIA	110	BOJ	42.5653	27.5131	1117	BHX	52.4525	-1.74411
BULGARIA	110	BOJ	42.5653	27.5131	74	BRU	50.9006	4.48393
BULGARIA	110	BOJ	42.5653	27.5131	641	LUX	49.629	6.21517
BULGARIA	110	BOJ	42.5653	27.5131	1140	NCL	55.0372	-1.70934
BULGARIA	110	BOJ	42.5653	27.5131	822	WMI	52.4497	20.6521
BULGARIA	110	BOJ	42.5653	27.5131	1143	EMA	52.8293	-1.33136
BULGARIA	110	BOJ	42.5653	27.5131	818	RZE	50.1149	22.0244
BULGARIA	110	BOJ	42.5653	27.5131	1130	LBA	53.8678	-1.6608
BULGARIA	110	BOJ	42.5653	27.5131	1124	EDI	55.9509	-3.3609
BULGARIA	110	BOJ	42.5653	27.5131	1107	OZH	47.8744	35.301
BULGARIA	110	BOJ	42.5653	27.5131	814	KRK	50.0771	19.7884
BULGARIA	110	BOJ	42.5653	27.5131	1099	HRK	49.9221	36.282
BULGARIA	110	BOJ	42.5653	27.5131	396	HAM	53.6336	9.99746
BULGARIA	110	BOJ	42.5653	27.5131	1106	VIN	49.2427	28.6059
BULGARIA	110	BOJ	42.5653	27.5131	1103	LWO	49.8142	23.9613
BULGARIA	110	BOJ	42.5653	27.5131	1126	GLA	55.8692	-4.43441
BULGARIA	110	BOJ	42.5653	27.5131	1116	BFS	54.6628	-6.21626
BULGARIA	110	BOJ	42.5653	27.5131	774	OSL	60.1974	11.1004
BULGARIA	110	BOJ	42.5653	27.5131	318	HEL	60.3257	24.9501
BULGARIA	110	BOJ	42.5653	27.5131	1110	DXB	25.2535	55.3652
BULGARIA	110	BOJ	42.5653	27.5131	876	DME	55.4107	37.9017
BULGARIA	110	BOJ	42.5653	27.5131	857	CEE	59.2808	38.0184
BULGARIA	110	BOJ	42.5653	27.5131	1114	ABZ	57.2035	-2.19931
BULGARIA	110	BOJ	42.5653	27.5131	281	CPH	55.6204	12.6493
BULGARIA	110	BOJ	42.5653	27.5131	386	CGN	50.8668	7.14189
BULGARIA	111	PDV	42.0771	24.8457	1137	STN	51.8862	0.238265
BULGARIA	111	PDV	42.0771	24.8457	876	DME	55.4107	37.9017
BULGARIA	112	SOF	42.6939	23.408	53	VIE	48.1111	16.5752
BULGARIA	112	SOF	42.6939	23.408	1136	LTN	51.8764	-0.371575
BULGARIA	112	SOF	42.6939	23.408	539	TLV	32.0132	34.8846
BULGARIA	112	SOF	42.6939	23.408	392	FRA	50.0379	8.5625
BULGARIA	112	SOF	42.6939	23.408	1134	LGW	51.1539	-0.182535
BULGARIA	112	SOF	42.6939	23.408	976	MAD	40.4989	-3.56519
BULGARIA	112	SOF	42.6939	23.408	553	BGY	45.6694	9.70392
BULGARIA	112	SOF	42.6939	23.408	965	BCN	41.2972	2.08368
BULGARIA	112	SOF	42.6939	23.408	358	CDG	49.0282	2.54309
BULGARIA	112	SOF	42.6939	23.408	746	EIN	51.4572	5.39444
BULGARIA	112	SOF	42.6939	23.408	414	ATH	37.9348	23.9462
BULGARIA	112	SOF	42.6939	23.408	75	CRL	50.4622	4.45738
BULGARIA	112	SOF	42.6939	23.408	745	AMS	52.3104	4.76862
BULGARIA	112	SOF	42.6939	23.408	387	DTM	51.517	7.61156
BULGARIA	112	SOF	42.6939	23.408	265	LCA	34.8726	33.6217
BULGARIA	112	SOF	42.6939	23.408	1135	LHR	51.4696	-0.454081
BULGARIA	112	SOF	42.6939	23.408	359	BVA	49.4543	2.111
BULGARIA	112	SOF	42.6939	23.408	383	TXL	52.5593	13.2893
BULGARIA	112	SOF	42.6939	23.408	928	BEG	44.8208	20.2929
BULGARIA	112	SOF	42.6939	23.408	1081	IST	41.2611	28.7441
BULGARIA	112	SOF	42.6939	23.408	1102	KBP	50.3386	30.8946
BULGARIA	112	SOF	42.6939	23.408	1137	STN	51.8862	0.238265
BULGARIA	112	SOF	42.6939	23.408	401	FMM	47.9869	10.2343
BULGARIA	112	SOF	42.6939	23.408	841	OTP	44.5705	26.0849
BULGARIA	112	SOF	42.6939	23.408	271	PRG	50.1045	14.2635
BULGARIA	112	SOF	42.6939	23.408	821	WAW	52.167	20.9683
BULGARIA	112	SOF	42.6939	23.408	565	FCO	41.8013	12.2456
BULGARIA	112	SOF	42.6939	23.408	937	BTS	48.1703	17.2107
BULGARIA	112	SOF	42.6939	23.408	458	BUD	47.4413	19.2537
BULGARIA	112	SOF	42.6939	23.408	1025	ZRH	47.4612	8.55427
BULGARIA	112	SOF	42.6939	23.408	74	BRU	50.9006	4.48393
BULGARIA	112	SOF	42.6939	23.408	403	MUC	48.351	11.7769
BULGARIA	112	SOF	42.6939	23.408	543	BLQ	44.5359	11.2876
BULGARIA	112	SOF	42.6939	23.408	555	MXP	45.6299	8.7257
BULGARIA	112	SOF	42.6939	23.408	542	BRI	41.1386	16.7654
BULGARIA	112	SOF	42.6939	23.408	894	LED	59.8034	30.2677
BULGARIA	112	SOF	42.6939	23.408	987	VLC	39.4895	-0.477682
BULGARIA	112	SOF	42.6939	23.408	556	NAP	40.8851	14.2891
BULGARIA	112	SOF	42.6939	23.408	671	MLA	35.8522	14.4864
BULGARIA	112	SOF	42.6939	23.408	877	SVO	55.9744	37.4133
BULGARIA	112	SOF	42.6939	23.408	1022	GVA	46.2369	6.10943
BULGARIA	112	SOF	42.6939	23.408	356	NCE	43.6599	7.21534
BULGARIA	112	SOF	42.6939	23.408	546	CTA	37.4688	15.0657
BULGARIA	112	SOF	42.6939	23.408	386	CGN	50.8668	7.14189
BULGARIA	112	SOF	42.6939	23.408	533	DUB	53.4264	-6.24897
BULGARIA	112	SOF	42.6939	23.408	1124	EDI	55.9509	-3.3609
BULGARIA	112	SOF	42.6939	23.408	564	CIA	41.7994	12.5928
BULGARIA	112	SOF	42.6939	23.408	399	FKB	48.7789	8.08987
BULGARIA	112	SOF	42.6939	23.408	1020	BSL	47.5995	7.5293
BULGARIA	112	SOF	42.6939	23.408	382	SXF	52.3647	13.51
BULGARIA	112	SOF	42.6939	23.408	280	BLL	55.7411	9.15686
BULGARIA	112	SOF	42.6939	23.408	962	ALC	38.2855	-0.559455
BULGARIA	112	SOF	42.6939	23.408	1131	LPL	53.3359	-2.85475
BULGARIA	112	SOF	42.6939	23.408	1117	BHX	52.4525	-1.74411
BULGARIA	112	SOF	42.6939	23.408	396	HAM	53.6336	9.99746
BULGARIA	112	SOF	42.6939	23.408	281	CPH	55.6204	12.6493
BULGARIA	112	SOF	42.6939	23.408	826	LIS	38.7758	-9.13511
BULGARIA	112	SOF	42.6939	23.408	1110	DXB	25.2535	55.3652
BULGARIA	112	SOF	42.6939	23.408	1260	ZAG	45.7414	16.0672
BULGARIA	112	SOF	42.6939	23.408	1138	MAN	53.3589	-2.27316
BULGARIA	112	SOF	42.6939	23.408	980	PMI	39.5522	2.73599
BULGARIA	112	SOF	42.6939	23.408	977	AGP	36.6771	-4.49366
BULGARIA	112	SOF	42.6939	23.408	415	CHQ	35.5411	24.1407
BULGARIA	112	SOF	42.6939	23.408	409	STR	48.6877	9.20596
BULGARIA	112	SOF	42.6939	23.408	352	MRS	43.4388	5.21356
BULGARIA	112	SOF	42.6939	23.408	1132	SEN	51.5706	0.692208
BULGARIA	112	SOF	42.6939	23.408	54	GYD	40.4655	50.0579
BULGARIA	112	SOF	42.6939	23.408	834	DOH	25.2636	51.6145
BULGARIA	112	SOF	42.6939	23.408	1119	BRS	51.3837	-2.71303
BULGARIA	112	SOF	42.6939	23.408	568	TSF	45.6539	12.2015
BULGARIA	112	SOF	42.6939	23.408	1143	EMA	52.8293	-1.33136
BULGARIA	112	SOF	42.6939	23.408	605	AQJ	29.6107	35.021
BULGARIA	112	SOF	42.6939	23.408	389	DUS	51.2875	6.76743
BULGARIA	112	SOF	42.6939	23.408	381	BER	52.365	13.5126
BULGARIA	113	VAR	43.2368	27.8278	1136	LTN	51.8764	-0.371575
BULGARIA	113	VAR	43.2368	27.8278	53	VIE	48.1111	16.5752
BULGARIA	113	VAR	43.2368	27.8278	382	SXF	52.3647	13.51
BULGARIA	113	VAR	43.2368	27.8278	403	MUC	48.351	11.7769
BULGARIA	113	VAR	43.2368	27.8278	396	HAM	53.6336	9.99746
BULGARIA	113	VAR	43.2368	27.8278	401	FMM	47.9869	10.2343
BULGARIA	113	VAR	43.2368	27.8278	641	LUX	49.629	6.21517
BULGARIA	113	VAR	43.2368	27.8278	409	STR	48.6877	9.20596
BULGARIA	113	VAR	43.2368	27.8278	271	PRG	50.1045	14.2635
BULGARIA	113	VAR	43.2368	27.8278	387	DTM	51.517	7.61156
BULGARIA	113	VAR	43.2368	27.8278	389	DUS	51.2875	6.76743
BULGARIA	113	VAR	43.2368	27.8278	539	TLV	32.0132	34.8846
BULGARIA	113	VAR	43.2368	27.8278	553	BGY	45.6694	9.70392
BULGARIA	113	VAR	43.2368	27.8278	265	LCA	34.8726	33.6217
BULGARIA	113	VAR	43.2368	27.8278	386	CGN	50.8668	7.14189
BULGARIA	113	VAR	43.2368	27.8278	404	FMO	52.1326	7.69172
BULGARIA	113	VAR	43.2368	27.8278	821	WAW	52.167	20.9683
BULGARIA	113	VAR	43.2368	27.8278	385	BRE	52.3162	10.5606
BULGARIA	113	VAR	43.2368	27.8278	1131	LPL	53.3359	-2.85475
BULGARIA	113	VAR	43.2368	27.8278	815	LCJ	51.7198	19.3926
BULGARIA	113	VAR	43.2368	27.8278	400	LEJ	51.4223	12.2209
BULGARIA	113	VAR	43.2368	27.8278	746	EIN	51.4572	5.39444
BULGARIA	113	VAR	43.2368	27.8278	74	BRU	50.9006	4.48393
BULGARIA	113	VAR	43.2368	27.8278	878	VKO	55.5997	37.272
BULGARIA	113	VAR	43.2368	27.8278	397	HAJ	52.4642	9.68561
BULGARIA	113	VAR	43.2368	27.8278	1102	KBP	50.3386	30.8946
BULGARIA	113	VAR	43.2368	27.8278	391	ERF	50.979	10.9564
BULGARIA	113	VAR	43.2368	27.8278	1025	ZRH	47.4612	8.55427
BULGARIA	113	VAR	43.2368	27.8278	1134	LGW	51.1539	-0.182535
BULGARIA	113	VAR	43.2368	27.8278	458	BUD	47.4413	19.2537
BULGARIA	113	VAR	43.2368	27.8278	894	LED	59.8034	30.2677
BULGARIA	113	VAR	43.2368	27.8278	48	GRZ	46.9944	15.4402
BULGARIA	113	VAR	43.2368	27.8278	392	FRA	50.0379	8.5625
BULGARIA	113	VAR	43.2368	27.8278	381	BER	52.365	13.5126
BULGARIA	113	VAR	43.2368	27.8278	1081	IST	41.2611	28.7441
BULGARIA	113	VAR	43.2368	27.8278	876	DME	55.4107	37.9017
BULGARIA	113	VAR	43.2368	27.8278	355	NTE	47.157	-1.60572
BULGARIA	113	VAR	43.2368	27.8278	318	HEL	60.3257	24.9501
BULGARIA	113	VAR	43.2368	27.8278	745	AMS	52.3104	4.76862
BURKINA FASO	114	BOY	11.1562	-4.33271	245	ABJ	5.25489	-3.93241
BURKINA FASO	115	OUA	12.3532	-1.51258	759	NIM	13.4825	2.18261
BURKINA FASO	115	OUA	12.3532	-1.51258	1057	LFW	6.17082	1.25399
BURKINA FASO	115	OUA	12.3532	-1.51258	245	ABJ	5.25489	-3.93241
BURKINA FASO	115	OUA	12.3532	-1.51258	670	BKO	12.5422	-7.94257
BURKINA FASO	115	OUA	12.3532	-1.51258	927	DSS	14.6715	-17.0671
BURKINA FASO	115	OUA	12.3532	-1.51258	411	ACC	5.60653	-0.168123
BURKINA FASO	115	OUA	12.3532	-1.51258	721	CMN	33.3698	-7.58589
BURKINA FASO	115	OUA	12.3532	-1.51258	79	COO	6.3529	2.38434
BURKINA FASO	115	OUA	12.3532	-1.51258	1081	IST	41.2611	28.7441
BURKINA FASO	115	OUA	12.3532	-1.51258	447	CKY	9.57671	-13.6113
BURKINA FASO	115	OUA	12.3532	-1.51258	933	FNA	8.61781	-13.2011
BURKINA FASO	115	OUA	12.3532	-1.51258	6	ALG	36.6982	3.20797
BURKINA FASO	115	OUA	12.3532	-1.51258	312	ADD	8.98434	38.7963
BURKINA FASO	115	OUA	12.3532	-1.51258	74	BRU	50.9006	4.48393
BURKINA FASO	115	OUA	12.3532	-1.51258	1069	TUN	36.8455	10.2198
BURKINA FASO	115	OUA	12.3532	-1.51258	358	CDG	49.0282	2.54309
BURUNDI	116	BJM	-3.31655	29.3219	911	KGL	-1.96338	30.135
BURUNDI	116	BJM	-3.31655	29.3219	1097	EBB	0.0438059	32.441
BURUNDI	116	BJM	-3.31655	29.3219	622	NBO	-1.32224	36.9271
BURUNDI	116	BJM	-3.31655	29.3219	312	ADD	8.98434	38.7963
BURUNDI	116	BJM	-3.31655	29.3219	74	BRU	50.9006	4.48393
BURUNDI	116	BJM	-3.31655	29.3219	1039	TKQ	-4.88954	29.6713
CAMBODIA	117	PNH	11.5535	104.846	170	CAN	23.3994	113.307
CAMBODIA	117	PNH	11.5535	104.846	166	CTU	30.5691	103.95
CAMBODIA	117	PNH	11.5535	104.846	958	ICN	37.4469	126.451
CAMBODIA	117	PNH	11.5535	104.846	203	PVG	31.1456	121.808
CAMBODIA	117	PNH	11.5535	104.846	204	SWA	31.2243	121.528
CAMBODIA	117	PNH	11.5535	104.846	206	SZX	22.639	113.814
CAMBODIA	117	PNH	11.5535	104.846	642	MFM	22.1578	113.577
CAMBODIA	117	PNH	11.5535	104.846	1032	TPE	25.0803	121.235
CAMBODIA	117	PNH	11.5535	104.846	657	KUL	2.73227	101.707
CAMBODIA	117	PNH	11.5535	104.846	809	MNL	14.513	121.017
CAMBODIA	117	PNH	11.5535	104.846	1046	DMK	13.9138	100.604
CAMBODIA	117	PNH	11.5535	104.846	1239	SGN	10.8191	106.659
CAMBODIA	117	PNH	11.5535	104.846	195	NKG	31.7343	118.872
CAMBODIA	117	PNH	11.5535	104.846	228	CGO	34.526	113.846
CAMBODIA	117	PNH	11.5535	104.846	218	XMN	24.5396	118.133
CAMBODIA	117	PNH	11.5535	104.846	497	CGK	-6.12727	106.654
CAMBODIA	117	PNH	11.5535	104.846	739	RGN	16.9103	96.1366
CAMBODIA	117	PNH	11.5535	104.846	175	HGH	30.2374	120.439
CAMBODIA	117	PNH	11.5535	104.846	1052	HKT	8.1119	98.3064
CAMBODIA	117	PNH	11.5535	104.846	183	KMG	25.0973	102.929
CAMBODIA	117	PNH	11.5535	104.846	1045	BKK	13.6896	100.751
CAMBODIA	117	PNH	11.5535	104.846	196	NNG	22.6106	108.171
CAMBODIA	117	PNH	11.5535	104.846	167	CKG	29.7204	106.642
CAMBODIA	117	PNH	11.5535	104.846	161	PEK	40.0805	116.604
CAMBODIA	117	PNH	11.5535	104.846	457	HKG	22.3085	113.919
CAMBODIA	117	PNH	11.5535	104.846	630	VTE	17.9755	102.569
CAMBODIA	117	PNH	11.5535	104.846	934	SIN	1.36425	103.992
CAMBODIA	117	PNH	11.5535	104.846	599	NRT	35.7726	140.393
CAMBODIA	117	PNH	11.5535	104.846	1047	CNX	18.7688	98.9642
CAMBODIA	117	PNH	11.5535	104.846	1236	DAD	16.0562	108.204
CAMBODIA	118	REP	13.4068	103.813	195	NKG	31.7343	118.872
CAMBODIA	118	REP	13.4068	103.813	198	NGB	29.8276	121.462
CAMBODIA	118	REP	13.4068	103.813	161	PEK	40.0805	116.604
CAMBODIA	118	REP	13.4068	103.813	194	KHN	28.8584	115.911
CAMBODIA	118	REP	13.4068	103.813	958	ICN	37.4469	126.451
CAMBODIA	118	REP	13.4068	103.813	628	LPQ	19.9021	102.169
CAMBODIA	118	REP	13.4068	103.813	1045	BKK	13.6896	100.751
CAMBODIA	118	REP	13.4068	103.813	167	CKG	29.7204	106.642
CAMBODIA	118	REP	13.4068	103.813	1046	DMK	13.9138	100.604
CAMBODIA	118	REP	13.4068	103.813	203	PVG	31.1456	121.808
CAMBODIA	118	REP	13.4068	103.813	1238	HAN	21.219	105.805
CAMBODIA	118	REP	13.4068	103.813	211	WXN	30.7984	108.432
CAMBODIA	118	REP	13.4068	103.813	457	HKG	22.3085	113.919
CAMBODIA	118	REP	13.4068	103.813	934	SIN	1.36425	103.992
CAMBODIA	118	REP	13.4068	103.813	183	KMG	25.0973	102.929
CAMBODIA	118	REP	13.4068	103.813	657	KUL	2.73227	101.707
[truncated: 24,915 more rows]
